# Supplementary material for: Patient-Level Pooled Analysis of Ultrasound Renal Denervation in the Sham-Controlled RADIANCE II, RADIANCE-HTN SOLO, and RADIANCE-HTN TRIO Trials
Source: PubMed Central journal article supplement — JAMA Cardiol. 2023 Feb 28;8(5):464–73. doi: 10.1001/jamacardio.2023.0338 (PMC9975919; doi:10.1001/jamacardio.2023.0338), 2023-02-28
Supplement: jamacardiol-e230338-s001.pdf [file jamacardiol-e230338-s001.pdf]

## Supplementary Online Content

Kirtane AJ, Sharp ASP, Mahfoud F, et al; RADIANCE Investigators and Collaborators. Patient-level pooled analysis of ultrasound renal denervation in the sham-controlled RADIANCE II, RADIANCE-HTN SOLO, and RADIANCE-HTN TRIO trials. *JAMA Cardiol*. Published online February 28, 2023. doi:10.1001/jamacardio.2023.0338

### eAppendix

**eFigure 1.** Two-Stage Meta-analysis Forest Plots Depicting 2-Month Mean Differences (MDs) and 95% CIs Results by Study and in Aggregate for Systolic BPs for Daytime Ambulatory, 24-Hour Ambulatory, Nighttime Ambulatory, Home, and Office Readings

**eFigure 2.** Daytime Ambulatory BP Control Rates and Daytime Systolic Ambulatory BP Change at 2 Months Stratified by Tertile of Starting Daytime Ambulatory Systolic BP Excluding Patients That Had Additional Antihypertension Medications Prior to 2 Months

**eTable 1.** Inclusion/Exclusion Criteria in Each Trial

**eTable 2.** Blood Pressure Measurement Methods, Safety Escape Criteria, and Procedural Methods Used in All Studies

**eTable 3.** Pooled Procedural Data Across Studies

**eTable 4.** Change in Ambulatory, Office, and Home Blood Pressure at 2 Months in the Ultrasound Renal Denervation Group (uRDN) and in the Sham Group in the Intention to Treat Population

**eTable 5.** Change in Ambulatory, Office, and Home Blood Pressure at 2 Months in the Ultrasound Renal Denervation Group (uRDN) and in the Sham Group in the Per-Protocol Population

**eTable 6.** Change in Ambulatory, Office, and Home Blood Pressure at 2 Months in the Ultrasound Renal Denervation Group (uRDN) and in the Sham Group in the Complete Ambulatory Blood Pressure Population

**eTable 7.** Proportion of Patients with Drops in Daytime Ambulatory, 24-Hour Ambulatory, Nighttime Ambulatory, and Home Systolic BP of  $\geq 5$ ,  $\geq 10$ ,  $\geq 15$  and  $\geq 20$  mm Hg in the Intention-to-Treat Population

**eTable 8.** Hypertension Control Rates at 2 Months

**eTable 9.** Multivariable Analysis of Daytime Ambulatory Systolic Blood Pressure in the Ultrasound Renal Denervation Group Only in the Intention-to-Treat Population

**eTable 10.** Changes in Kidney Function at 2 Months in Patients With Matched Data at Baseline and 2 Months

### eReferences

This supplementary material has been provided by the authors to give readers additional information about their work.

## eAppendix

### 1. RADIANCE-HTN SOLO, RADIANCE-HTN TRIO, RADIANCE II Organization

#### 1.1. Oversight

##### Principal Investigators

- Michel Azizi, MD, PhD – Université de Paris, Paris, France; AP-HP, Hôpital Européen Georges-Pompidou, Hypertension Department and DMU CARTE, Paris, France; INSERM, CIC1418, Paris, France
- Ajay J. Kirtane, MD, SM – Columbia University Irving Medical Center/New York-Presbyterian Hospital and the Cardiovascular Research Foundation, New York, NY, USA

##### Steering Committee Members

- Jan Basile, MD – Division of Cardiology, Medical University of South Carolina, Ralph H Johnson VA Medical Center, Charleston, SC, USA
- Michael J. Bloch, MD – Department of Medicine, University of Nevada School of Medicine, Vascular Care, Renown Institute of Heart and Vascular Health, Reno, NV, USA
- Joost Daemen, MD, PhD – Erasmus MC, University Medical Center Rotterdam, Department of Cardiology, Rotterdam, NL
- Naomi Fisher, MD – Brigham and Women's Hospital and Harvard Medical School, Boston, MA, USA
- Melvin D. Lobo, PhD, FRCP – Barts BP Centre of Excellence, Barts Heart Centre, St Bartholomew's Hospital, London, UK and William Harvey Research Institute, NIHR Barts Cardiovascular Biomedical Research Centre, Queen Mary University London, London, UK
- Philipp Lurz – Department of Internal Medicine/Cardiology, Heart Center Leipzig, University of Leipzig, Leipzig, Germany;
- Felix Mahfoud, MD – Klinik für Innere Medizin III, Saarland University Hospital, Homburg/Saar, Germany; Institute for Medical Engineering and Science, Massachusetts Institute of Technology, Cambridge, MA, USA
- Roland E. Schmieder, MD – Nephrology and Hypertension, University Hospital Erlangen, Friedrich Alexander University, Erlangen, Germany
- Andrew SP Sharp, MD – University Hospital of Wales, Cardiff and Cardiff University, UK
- Michael A. Weber, MD – Division of Cardiovascular Medicine, State University of New York, Downstate Medical Center, New York, NY, USA

##### Biostatistics

Biostatisticians from NAMSA were responsible for providing the statistical analysis.

- Lisa Thackeray, MS – NAMSA, Minneapolis, MN, USA
- Christopher Mullin, MS - NAMSA, Minneapolis, MN, USA
- Candace K. McClure, PhD – NAMSA, Minneapolis, MN, USA

### **Data Safety and Monitoring Board (DSMB)**

- Glenn Chertow, MD, MPH – Nephrology, Stanford University, Stanford, CA, USA
- Harold Dauerman, MD – Interventional Cardiology, University of Vermont Medical Center, Burlington, VT, USA
- Thomas Kahan, MD, PhD – Cardiology, Karolinska Institutet, Stockholm, Sweden
- Steven Ullery – Biostatistics, NAMSA, Minneapolis, MN, USA
- Venita Chandra, MD- Vascular Surgery, Stanford University, Stanford, CA, USA (RADIANCE II only)

### **Clinical Events Committee (CEC) (RADIANCE II and RADIANCE Pooled Safety)**

The CEC was managed by the Cardiovascular Research Foundation (New York, NY, USA) and included the following members:

- Nirat Beohar, MD – Cardiology, Mount Sinai Medical Center, Miami Beach, FL, USA
- Ozgen Dogan, MD – Diagnostic Cardiology Associates, New York Presbyterian/Columbia, Brooklyn, NY, USA
- Michelle Mokrzycki, MD, MS – Nephrology, Montefiore Medical Center, Albert Einstein College of Medicine, Bronx, NY USA
- Scott Mullaney, MD – Nephrology-Hypertension, UCSD School of Medicine, San Diego, CA, USA
- Bjorn Redfors, MD, PhD (Non-voting) - Cardiovascular Research Foundation, New York, NY, USA
- Huseng Vefali, MD, MHSA - Cardiology, Professor of Medicine Weill Cornell SOM NY- Presbyterian-BMH, Brooklyn, NY USA

### **Independent Clinical Events Adjudication (SOLO and TRIO)**

- J. Dawn Abbott, MD – Interventional Cardiology, Warren Alpert Medical School, Brown University, Providence, RI, USA

### **Independent Radiologists**

- Andreas Loening, MD, PhD – Radiology, Stanford University, Stanford, CA, USA
- Ron Zagoria, MD – Radiology, UCSF, San Francisco, CA, USA

### **Independent Imaging Core Lab (RADIANCE II and RADIANCE Pooled Safety)**

- Cardiovascular Research Foundation, New York, NY USA

### **Investigators and Lead Study Coordinators by Country**

#### **RADIANCE II Investigators and Lead Study Coordinators by Country**

##### **United States**

**Minneapolis Heart Institute Foundation, Minneapolis, MN:** Yale Wang, Nedaa Skeik, Richard Bae, Amy McMeans, JoAnne Goldman, Rose Peterson. **Ochsner Heart and Vascular Institute, New Orleans, LA:** James Stephen Jenkins, Isabelle Tutor, Michael Harrison, Angel Penning. **Emory University, Atlanta GA:** Chandan Devireddy, Janice Lea, Amanda Fiebach, Claudia Merlin. **Cedars-Sinai Medical Center, Los Angeles, CA:** Florian Rader, Suhail Dohad, Anne Tran, Kirin Bhatia. **The Brigham and Women's Hospital, Boston, MA:** Naomi DL Fisher, Piotr Sobieszczyk, Ian Halliday, Tay Munson. **Saint Lukes Hospital of Kansas City, Kansas City, MO:** Jason Lindsey, Steven Laster, Mathew Bunte, Anthony Hart, Dana King, Jamie Hall. **Deborah Heart & Lung Center, Brown Mills, NJ:** Kintur Sanghvi, Courtney Krathen, Luot Lewis, Ashley Willitts. **Medical University of South Carolina, Charleston, SC:** Thomas Todoran, Jan Basile, Anthony Awkar, Casey Palmer, Anna Tecklenburg. **University of Pittsburgh Medical Center, Pittsburgh, PA:** John Schindler, John Pacella, Matthew Muldoon, MaryJo Albright,

Tracy Nicholson. **Southern Illinois University School of Medicine, Springfield, IL:** John Flack, Youseff Chami, Abdul Moiz Hafiz, Emily Starkey, Kristal Adams. **MedStar Washington Health Research, Baltimore, MD:** Nelson Bernardo, Judith Veis, Hayder Hashim, Suman Singh, Donna Whitman. **The University of North Carolina, Chapel Hill, NC:** Rick Stouffer, Alan Hinderliter, Meghan Allen, Tatum Scholl. **Vanderbilt University Medical Center, Nashville, TN:** Pete Fong, James Gainer, Sherron Crook, Ellen Hatchcock. **Penn Medicine, Philadelphia, PA:** Debbie Cohen, Jay Giri, Taisei Kobayashi, Robin Neubauer, Suveeksha Naidu. **Columbia University Medical Center New York, NY:** Ajay J. Kirtane, Jai Radhakrishnan, Candido Batres, Suzanne Edwards. **The Cardiac and Vascular Institute Gainesville, FL:** Matheen Khuddus, Suzanne Zentko, Abby Touchton, Marti Roberson. **Renown Regional Medical Center, Reno, NV:** Michael J. Bloch, Abhilash Akinapelli, Lisa English, Bridget Neumann. **Cardiology PC, Birmingham, AL:** Farrel Mendelsohn, Hutton Brantley, Thomas Cawthon, Susan DeRamus, Wesley Wade. **Bridgeport Hospital, Bridgeport, CT:** Robert Fishman, Edward Tuohy, Jessica LeBlanc, Tina McCurry. **Cleveland Clinic Foundation, Cleveland, OH:** Amar Krishnaswamy, Luke Laffin, Christopher Bajzer, Marilyn Boros, Monica Branche. **University of Utah Medical Center, Salt Lake City, UT:** Josephine Abraham, Anu Abraham, Inge Stijleman. **Stamford Hospital, Stamford, CT:** David Hsi, Scott Martin, Edward Portnay, Maryann Fiebach, Carolina Garavito. **Munson Medical Center, Traverse City, MI:** Todd Adams, Andrew Teklinski, Adam Leech, Patrick Drilling, Lynda Tulik. **Northwestern University, Chicago, IL:** Keith Benzuly, James Paparello, Dan Fintel, Haydee Ramirez, Lauren Kats. **Swedish Medical Center, Seattle, WA:** Paul Huang, MD; Santanu Biswas, Serena Risher, Kristina Pratt. **University of Tennessee, Memphis, Memphis, TN:** Uzoma Ibebuogu, Karen Johnson, William Cushman, Lisa Jones, Leigh Jackson. **Hackensack University, Hackensack, NJ:** David Landers, Tilak Pasala, Thomas Salazer, Peter Canino, Patricia Arakelian. **Northwell Health- New York, NY:** Yi-Ming Yang, Asma Khaliq, Mitchell Weinberg, Yihenew Abetu, Alana Gulliver. **Stony Brook Medicine:** J.P. Reilly. **Massachusetts General Hospital, Boston, MA:** Joseph Garasic. **Franciscan Health, Indianapolis, IN:** Atul Chugh. **Cardiology Associates of North Mississippi, Tupelo, MS:** Barry Bertolet. **WakeMed Clinical Research Institute, Raleigh, NC:** Brian Go. **San Diego Cardiac Center, San Diego, CA:** Raghava Gallapudi. **Sparrow Clinical Research Institute:** Joel Cohn. **University of Colorado, Denver, CO:** Kevin Rogers

### United Kingdom

**St Barts Health:** Manish Saxena, Anthony Mathur, Ajay Jain, Armida Balawon, Oliver Zongo, Christine Topham. **University Hospital of Wales Cardiff:** Andrew Sharp, Richard Anderson, Elizabeth Thompson, Nikki Spiro, Elizabeth Hodges, Jaqueline Holder. **Freeman Hospital Newcastle:** Timothy Ellam, Alan Bagnall, Ralph Jackson, Victoria Bridgett, Peter Wilson. **Kent and Canterbury Hospital:** Neelanjan Das, Timothy Doulton, David Loader, Gemma Hector. **Royal Bournemouth Hospital / University Hospitals Dorset NHS Foundation Trust:** Terry Levy, Clare Bent, Vivek Kodoth, Stephanie Horler, Sara Nix. **Cardiothoracic Centre Basildon University Hospital Essex:** Nicholas Robinson, Firas Al-Janabi, Jeremy Sayer, Sudha Ganesh Iyer, Emily Redman, Jonaifah Ramirez. **Queen Elizabeth University Hospital Glasgow:** Sandosh Padmanabhan

### Ireland

**University Hospital Galway:** Faisal Sharif, Aishah Alhmoudi, Mattia Lunardi, Eileen Coen, Nicola Glynn

### Germany

**University Clinic of Saarland- Homburg:** Felix Mahfoud, Lucas Lauder, Saarraaken Kulenthiran, Christina Koch, Angelika Wachter. **University Clinic Erlangen:** Roland Schmieder, Axel Schmid, Dennis Kannenkeril, Ulrike Heinritz, Kerstin Endres-Frohlich. **Heart Center, Leipzig:** Philipp Lurz, Karl Rommel, Karl Fengler; Martin Petzold, Margit Büttner. **Sana Kliniken Lubeck GmbH:** Joachim Weil, Tolga Agdirlioglu, Tanja Köllner, Jeannine Stephan. **Klinikum Konstanz:** Nikolaos Dagkonakis, Frank Hamann, Ute Ettl, Ulrike Petzsche. **Klinikum Karlsruhe:** Peter Reimer, Martin Hausberg, Ralf Hinrichs, Isabella Di Ponio-Voit. **UKSH Kiel:** Matthias Lutz

### France

**Hôpital Saint-André – CHU, Bordeaux:** Philippe Gosse, Antoine Cremer, Panteleimon Papadopoulos, Julie Gaudissard, Florent Maire. **Hôpital Européen Georges-Pompidou, Paris:** Michel Azizi, Marc

Sapoval, Marine Livrozet, Asma Regrag, Valerie Paquet. **CHRU Lille, Lille:** Pascal Delsart, Justin Hennicaux, Coralie Bailly-Sommeville, Fabien Bertrand.

#### The Netherlands

**Erasmus MC, Rotterdam:** Joost Daemen, Melvin Lafeber, Victor Zeijen, Amo Ruiten, Elisabeth Huijskens. **Noordwest Ziekenhuisgroep – Alkmaar:** Jan van Ramshorst

#### Belgium

**UMC Saint Pierre - Panagiotis Xaplanteris, Rachid Briki, Quentin de Hemptinne, Severine Pascal, Katty Renard. Hopital Civel Marie Curie Charleroi -Pascal Lefebvre. ZOL Genk – Bert Ferdinande**

#### Switzerland

**Hopitaux Universitaires Geneva:** Juan Iglesias, Georg Ehert, Laetitia Gallego, Kevin Dobretz, Sylviane Bottone

### RADIANCE-HTN TRIO Investigators and Lead Study Coordinators by Country

#### United States

**Deborah Heart & Lung Center, Brown Mills, NJ:** Kintur Sanghvi, Josh Costello, Courtney Krathan, Luot Lewis, Andrew McElvarr. **Ochsner Heart and Vascular Institute, New Orleans, LA:** John Reilly, Stephen Jenkins Michael Cash, Shannon Williams, Maria Jarvis. **Vanderbilt University Medical Center, Nashville, TN:** Pete Fong, Cheryl Laffer, James Gainer, Mark Robbins, Sherron Crook, Sarita Maddel. **Stamford Hospital, Stamford, CT:** David Hsi, Scott Martin, Edward Portnay, Maryanne Ducey, Suzanne Rose, Elizabeth DelMastro. **NYU Langone Medical Center, New York, NY:** Sripal Bangalore, Stephen Williams, Stanley Cabos, Carolina Rodriguez Alvarez. **Medical University of South Carolina, Charleston, SC:** Thomas Todoran, Jan Basile, Eric Powers, Emily Hodskins, Vijay Paladugu, Anna Tecklenburg. **Emory University, Atlanta GA:** Chandan Devireddy, Janice Lea, Bryan Wells, Amanda Fiebach, Claudia Merlin. **Cedars-Sinai Medical Center, Los Angeles, CA:** Florian Rader, Suhail Dohad, Hyun-Min Kim, Mohammad Rashid. **University of Utah Medical Center, Salt Lake City, UT:** Josephine Abraham, Theophilus Owan, Anu Abraham, Iran Lavasani, Hailey Neilson. **University of Alabama, Birmingham, AL:** David Calhoun, Thomas McElderry, William Maddox, Suzanne Oparil, Sheila Kinder. **Columbia University Medical Center New York, NY:** Ajay J. Kirtane, Jai Radhakrishnan, Candido Batres, Suzanne Edwards. **Mass General Hospital, Boston, MA:** Joseph Garasic, Doug Drachman, Randy Zusman, Kenneth Rosenfield, Danny Do. **The Cardiac and Vascular Institute Gainesville, FL:** Matheen Khuddus, Suzanne Zentko, James O'Meara, Ilie Barb, Abby Foster, Alice Boyette. **Minneapolis Heart Institute Foundation, Minneapolis, MN:** Yale Wang, Desmond Jay, Nedaa Skeik, Robert Schwartz, Rose Peterson, Jo Anne Goldman. **Drexel University, Philadelphia, PA:** Jessie Goldman, Gary Ledley, Nancy Katof. **The Heart Hospital Baylor Plano, Plano, TX:** Srinivasa Potluri, Scott Biedermann Jacquelyn Ward, Megan White. **The Brigham and Women's Hospital, Boston, MA:** Naomi DL Fisher, Laura Mauri, Piotr Sobieszczky, Alex Smith, Laura Aseltine. **The University of North Carolina, Chapel Hill, NC:** Rick Stouffer, Alan Hinderliter, Eric Pauley, Tyrone Wade. **University Hospitals Cleveland Medical Center, Cleveland, OH:** David Zidar, Mehdi Shishehbor, Barry Effron, Marco Costa, Terence Semene. **Renown Regional Medical Center, Reno, NV:** Michael J. Bloch, Chanwit Roongsritong, Priscilla Nelson, Bridget Neumann. **University of Pennsylvania:** Debbie Cohen, Jay Giri, Robin Neubauer, Thu Vo. **Franciscan Health Indianapolis, Indianapolis, IN:** Atul R. Chugh. **Sutter Medical Center, Sacramento, CA:** Pei-Hsiu Huang, Powell Jose. **Southern Illinois University School of Medicine, Springfield, IL:** John Flack. **Bridgeport Hospital, Bridgeport, CT:** Robert Fishman. **Baptist Health Lexington, Lexington, KY:** Michael Jones. **Munson Medical Center, Traverse City, MI:** Todd Adams. **Cleveland Clinic, Cleveland, OH:** Christopher Bajzer.

#### United Kingdom

**Barts Health NHS Trust, London:** Manish, Saxena, Melvin D. Lobo, Anthony Mathur, Ajay Jain, Armida Balawon, Olivier Zongo. **Royal Bournemouth Hospital / University Hospitals Dorset NHS**

**Foundation Trust, Dorset:** Terry Levy, Clare Bent, David Beckett, Nicki Lakeman, Sarah Kennard. **The Royal Devon and Exeter NHS Foundation Trust, Exeter:** Andrew Sharp, Richard J D'Souza, Sarah Statton, Lindsay Wilkes, Christine Anning. **Cardiothoracic Centre Basildon University Hospital Essex:** Jeremy Sayer, Sudha Ganesh Iyer, Nicholas Robinson, Annaliza Sevillano, Madelaine Ocampo. **East Sussex Healthcare NHS Trust, Sussex:** Robert Gerber, Mohamad Faris, Andrew John Marshall, Janet Sinclair, Hayley Pepper. **Hammersmith Hospital, Imperial College Healthcare NHS Trust, London:** Justin Davies, Neil Chapman, Paula Burak, Paula Carvelli. **Nottingham University Hospitals NHS Trust, Nottingham:** Sachin Jadhav, Jane Quinn.

### Germany

**Düsseldorf University Hospital, Düsseldorf:** Lars Christian Rump, Johannes Stegbauer, Lars Schimmöller, Sebastian Potthoff, Claudia Schmid, Sylvia Roeder. **Sana Kliniken Lübeck GmbH, Lübeck:** Joachim Weil, Lukas Hafer, Tolga Agdirlioglu, Tanja Köllner. **Saarland University Hospital, Homburg:** Felix Mahfoud, Michael Böhm, Sebastian Ewen, Saarraaken Kulenthiran, Angelika Wachter, Christina Koch. **Heart Center, Leipzig:** Philipp Lurz, Karl Fengler, Karl-Philipp Rommel, Kai Trautmann, Martin Petzold. **University Hospital Erlangen, Erlangen:** Roland E. Schmieder, Christian Ott, Axel Schmid, Michael Uder, Ulrike Heinritz, Kerstin Fröhlich-Endres. **Katholisches Klinikum Mainz, Mainz:** Sabine Genth-Zotz, Denise Kämpfner, Armin Grawe, Johannes Höhne. Bärbel Kaesberger. **Freiburg University and Faculty of Medicine, Freiburg:** Constantin von zur Mühlen, Dennis Wolf, Markus Welzel. Gudrun Heinrichs, Barbara Trabitzsch

### France

**Hôpital Saint-André – CHU, Bordeaux:** Philippe Gosse, Antoine Cremer, Hervé Trillaud, Panteleimon Papadopoulos, Florent Maire, Julie Gaudissard. **Hôpital Européen Georges-Pompidou, Paris:** Michel Azizi, Marc Sapoval, Erika Cornu, David Fouassier, Marine Livrozet, Aurélien Lorthioir, Valérie Paquet. **Clinique Pasteur / GCVI, Toulouse:** Atul Pathak, Benjamin Honton, Marianne Cottin, Frédéric Petit. **Hôpital de la Croix Rousse, Lyon:** Pierre Lantelme, Constance Berge, Pierre-Yves Courand, Fatou Langevin. **CHRU Lille, Lille:** Pascal Delsart, Benjamin Longere, Guillaume Ledieu, François Pontana, Coralie Bailly-Sommeville, Fabien Bertrand.

### The Netherlands

**Erasmus MC, Rotterdam:** Joost Daemen, Lida Feyz, Victor Zeijen, Arno Ruiten, Elisabeth Huyskens. **University Medical Center Utrecht, Utrecht:** Peter Blankestijn, Michiel Voskuil, Zwaantina Rittersma, Helma Dolmans. **Maastricht University Hospital, Maastricht:** A.A. Kroon, W.H. van Zwam, Jeannique Vranken, Claudia de Haan.

### Belgium

**Cliniques Universitaires Saint-Luc, Brussels:** Alexandre Persu, Jean Renkin, Frédéric Maes, Christophe Beauloye, Jean-Philippe Lengelé, Dominique Huyberegts, Anne Bouvier.

### Poland

**Institute of Cardiology, Warsaw:** Adam Witkowski, Andrzej Januszewicz, Jacek Kądziała, Aleksander Prejbisj. **Medical University of Gdansk, Gdansk:** Dagmara Hering, Dariusz Ciecwierz, Milosz J. Jaguszewski, Radoslaw Owczuk, Dariusz Ciecwierz, Milosz J. Jaguszewski.

### RADIANCE-HTN SOLO Investigators by Country

#### United States

**Minneapolis Heart Institute Foundation, Minneapolis, MN:** Yale Wang, Desmond Jay, Nedaa Skeik, Robert Schwartz. **Cedars-Sinai Medical Center, Los Angeles, CA:** Florian Rader, Suhail Dohad, Ronald

Victor. **Deborah Heart & Lung Center, Brown Mills, NJ:** Kintur Sanghvi, Josh Costello, Courtney Walsh. **University of Utah Medical Center, Salt Lake City, UT:** Josephine Abraham, Theophilus Owan, Anu Abraham. **The Brigham and Women's Hospital, Boston, MA:** Naomi DL Fisher, Laura Mauri, Piotr Sobieszczky, Jonathan Williams. **Renown Regional Medical Center, Reno, NV:** Michael J. Bloch, Chanwit Roongsritong. **Medical University of South Carolina, Charleston, SC:** Thomas Todoran, Jan Basile, Eric Powers, Emily Hodskins. **Vanderbilt University Medical Center, Nashville, TN:** Pete Fong, Cheryl Laffer, James Gainer, Mark Robbins. **Ochsner Heart and Vascular Institute, New Orleans, LA:** John Reilly, Michael Cash. **Drexel University, Philadelphia, PA:** Jessie Goldman, Sandeep Aggarwal, Gary Ledley. **Stamford Hospital, Stamford, CT:** David Hsi, Scott Martin, Edward Portnay. **University of Alabama, Birmingham, AL:** David Calhoun, Thomas McElderry, William Maddox, Suzanne Oparil. **Sutter Medical Center, Sacramento, CA:** Pei-Hsiu Huang, Powell Jose. **The Cardiac and Vascular Institute Gainesville, FL:** Matheen Khuddus, Suzanne Zentko, James O'Meara, Ilie Barb. **Mass General Hospital, Boston, MA:** Joseph Garasic, Doug Drachman, Randy Zusman, Kenneth Rosenfield. **Emory University, Atlanta GA:** Chandan Devireddy, Janice Lea, Bryan Wells. **The University of North Carolina, Chapel Hill, NC:** Rick Stouffer, Alan Hinderliter, Eric Pauley. **The Heart Hospital Baylor Plano, Plano, TX:** Srinivasa Potluri, Scott Biedermann. **NYU Langone Medical Center, New York, NY:** Sripal Bangalore, Stephen Williams. **University Hospitals Cleveland Medical Center, Cleveland, OH:** David Zidar, Mehdi Shishehbor, Barry Efron, Marco Costa. **Columbia University Medical Center New York, NY:** Ajay J. Kirtane, Jai Radhakrishnan.

### United Kingdom

**St. Barts Health NHS Trust, London:** Melvin D. Lobo, Manish, Saxena, Anthony Mathur, Ajay Jain.\* **Cardiothoracic Centre Basildon University Hospital, Essex:** Jeremy Sayer, Sudha Ganesh Iyer, Nicholas Robinson, Sadat Ali Edroos. **Royal Bournemouth Hospital / University Hospitals Dorset NHS Foundation Trust:** Terry Levy, Amit Patel, David Beckett, Clare Bent. **Hammersmith Hospital, Imperial College Healthcare NHS Trust, London:** Justin Davies, Neil Chapman, Matthew Shun Shin, James Howard. **The Royal Devon and Exeter NHS Foundation Trust, Exeter:** Andrew SP Sharp, Anil Joseph, Richard D'Souza.\*\* **Conquest Hospital, East Sussex Healthcare NHS Trust, Sussex:** Robert Gerber, Mohamad Faris, Andrew John Marshall, Cristina Elorz.

\* This work forms part of the research portfolio for the National Institute for Health Research Barts Biomedical Research Centre.

\*\* The Royal Devon and Exeter Hospital would like to acknowledge the support of the Exeter NIHR Clinical Research Facility

### Germany

**Leipzig Heart Center, Leipzig:** Philipp Lurz, Robert Höllriegel, Karl Fengler, Karl-Philipp Rommel. **University Clinic of Saarland, Homburg:** Felix Mahfoud, Michael Böhm, Sebastian Ewen, Jelena Lucic. **University Clinic Erlangen, Erlangen:** Roland E. Schmieder, Christian Ott, Axel Schmid, Michael Uder. **University Clinic Dusseldorf, Dusseldorf:** Christian Rump, Johannes Stegbauer, Patric Kröpil.

### France

**Hôpital Européen Georges-Pompidou, Paris:** Michel Azizi, Marc Sapoval, Erika Cornu, David Fouassier. **Hôpital Saint-André – CHU, Bordeaux:** Philippe Gosse, Antoine Cremer, Hervé Trillaud, Panteleimon Papadopoulos. **Clinique Pasteur / GCVI, Toulouse:** Atul Pathak, Benjamin Honton. **Hôpital de la Croix Rouse, Lyon:** Pierre Lantelme, Constance Berge, Pierre-Yves Courand.

### The Netherlands

**Erasmus MC, Rotterdam:** Joost Daemen, Lida Feyz. **University Medical Center Utrecht, Utrecht:** Peter Blankestijn, Michiel Voskuil, Zwaantina Rittersma. **Maastricht University Hospital, Maastricht:** A.A. Kroon, W.H. van Zwam.

## **Belgium**

**Cliniques Universitaires Saint-Luc, Brussels:** Alexandre Persu, Jean Renkin.

### **1.2. Funding**

RADIANCE-HTN SOLO, RADIANCE-HTN TRIO, and RADIANCE II were funded by ReCor Medical, Inc., Palo Alto, CA.

### **1.3. Roles and Responsibilities**

#### **Design Contributors**

Entities that contributed to the design of the study included:

- Principal Investigators and Steering Committee
- ReCor Medical, Inc., Palo Alto, CA
- NAMSA, Minneapolis, MN

#### **Data Collection and Analysis**

Data collection and analysis was coordinated by ReCor Medical, Inc. The following entities performed independent data and statistical analysis:

- NAMSA, Minneapolis, MN
- Baim Institute for Clinical Research, Boston, MA

#### **Manuscript Responsibility**

Ajay J. Kirtane, MD, SM and Michel Azizi, MD, PhD jointly wrote the manuscript.

All remaining authors reviewed the manuscript and provided edits and additions. Submission for publication was made by Dr. Kirtane / Dr. Azizi on behalf of the authors.

The sponsor reviewed the manuscript in advance of publication. However, they did not have the right of refusal for any aspects of the writing or publication.



## **2. Population Definitions**

### **Intention-to-Treat (ITT)**

The ITT population was defined as all randomized subjects analyzed according to their original randomization assignment.

There were 293 ultrasound renal denervation (uRDN) and 213 sham patients included in the ITT population.

Multiple imputation was employed for subjects with missing ABP data at 2 months (12 subjects randomized to uRDN and 2 subject randomized to sham). Subjects meeting escape criteria for initiation of anti-hypertensives (5 subjects randomized to uRDN and 13 subjects randomized to sham) were imputed using last observation carried forward.

### **Complete Ambulatory Blood Pressure (CA)**

The CA population was defined as all randomized subjects analyzed according to their original randomization assignment that had ABP values at both baseline and follow-up.

There were 12 uRDN subjects and 2 sham subjects missing ABP values at 2 months. A total of 281 uRDN and 211 sham patients were included in the CA population.

### **Per-Protocol (PP)**

The PP population was defined as all subjects who were randomized, had treatment delivered successfully and were free from major issues which may affect the assessment of the treatment:

- Baseline daytime ABP <135/85 mm Hg or failure to obtain baseline ABP recording
- Renal artery anatomical exclusion deviations
- Failure to obtain 2-month follow-up ABP recording
- Subjects restarting antihypertensive medication, for any reason, prior to the 2-month primary endpoint.

There were 43 subjects excluded from the PP analysis in the uRDN group: 4 with daytime diastolic ABP lower than entry criteria, 12 missing the 2-month ABP, 2 had renal artery anatomy exclusions, 5 added medications prior to 2-months who met the High BP Action criteria, 13 added medications prior to 2-months without meeting the High BP Action criteria, 7 with unsuccessful treatment.

There were 35 subjects excluded from the PP analysis in the Sham group: 2 with daytime diastolic ABP lower than entry criteria, 2 missing the 2-month ABP, 13 added medications prior to 2 months who met the High BP Action criteria, 18 added medications prior to 2 months without meeting the High BP Action criteria.

A total of 250 uRDN and 178 sham patients were included in the PP population.

## **3. Multivariable Analysis**

A prespecified multiple linear regression analysis was done to assess change in daytime systolic blood pressure with the following variables independent variables: group, study, sex, race (black vs. non-black), age, baseline daytime ambulatory systolic blood pressure, baseline 24-hour ambulatory heart rate, eGFR, geography, and abdominal obesity.

An exploratory multiple linear regression analysis was done to assess change in daytime systolic blood pressure in the uRDN group only with the same independent variables excluding group.

#### 4. Supplemental Figures and Tables

**eFigure 1.** Two-Stage Meta-analysis Forest Plots Depicting 2-Month Mean Differences (MDs) and 95% CIs Results by Study and in Aggregate for Systolic BPs for Daytime Ambulatory, 24-Hour Ambulatory, Nighttime Ambulatory, Home, and Office Readings

#### Tests for Heterogeneity are Included

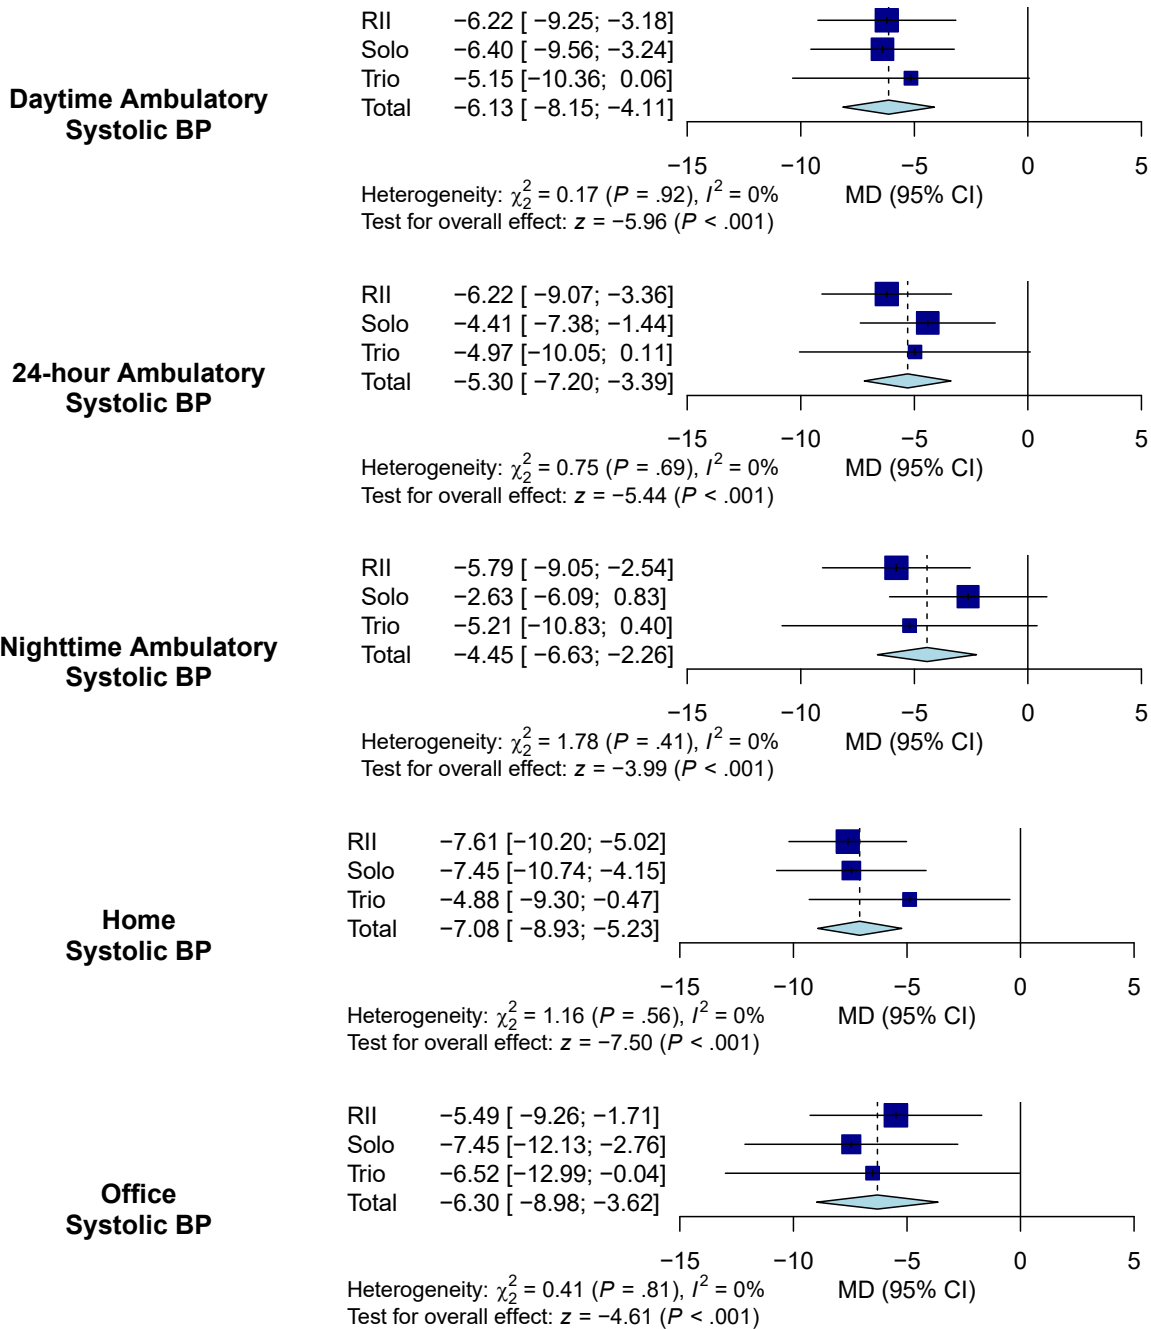

**eFigure 2.** Daytime Ambulatory BP Control Rates and Daytime Systolic Ambulatory BP Change at 2 Months Stratified by Tertile of Starting Daytime Ambulatory Systolic BP Excluding Patients That Had Additional Antihypertension Medications Prior to 2 Months (uRDN n=261, Sham n=180)

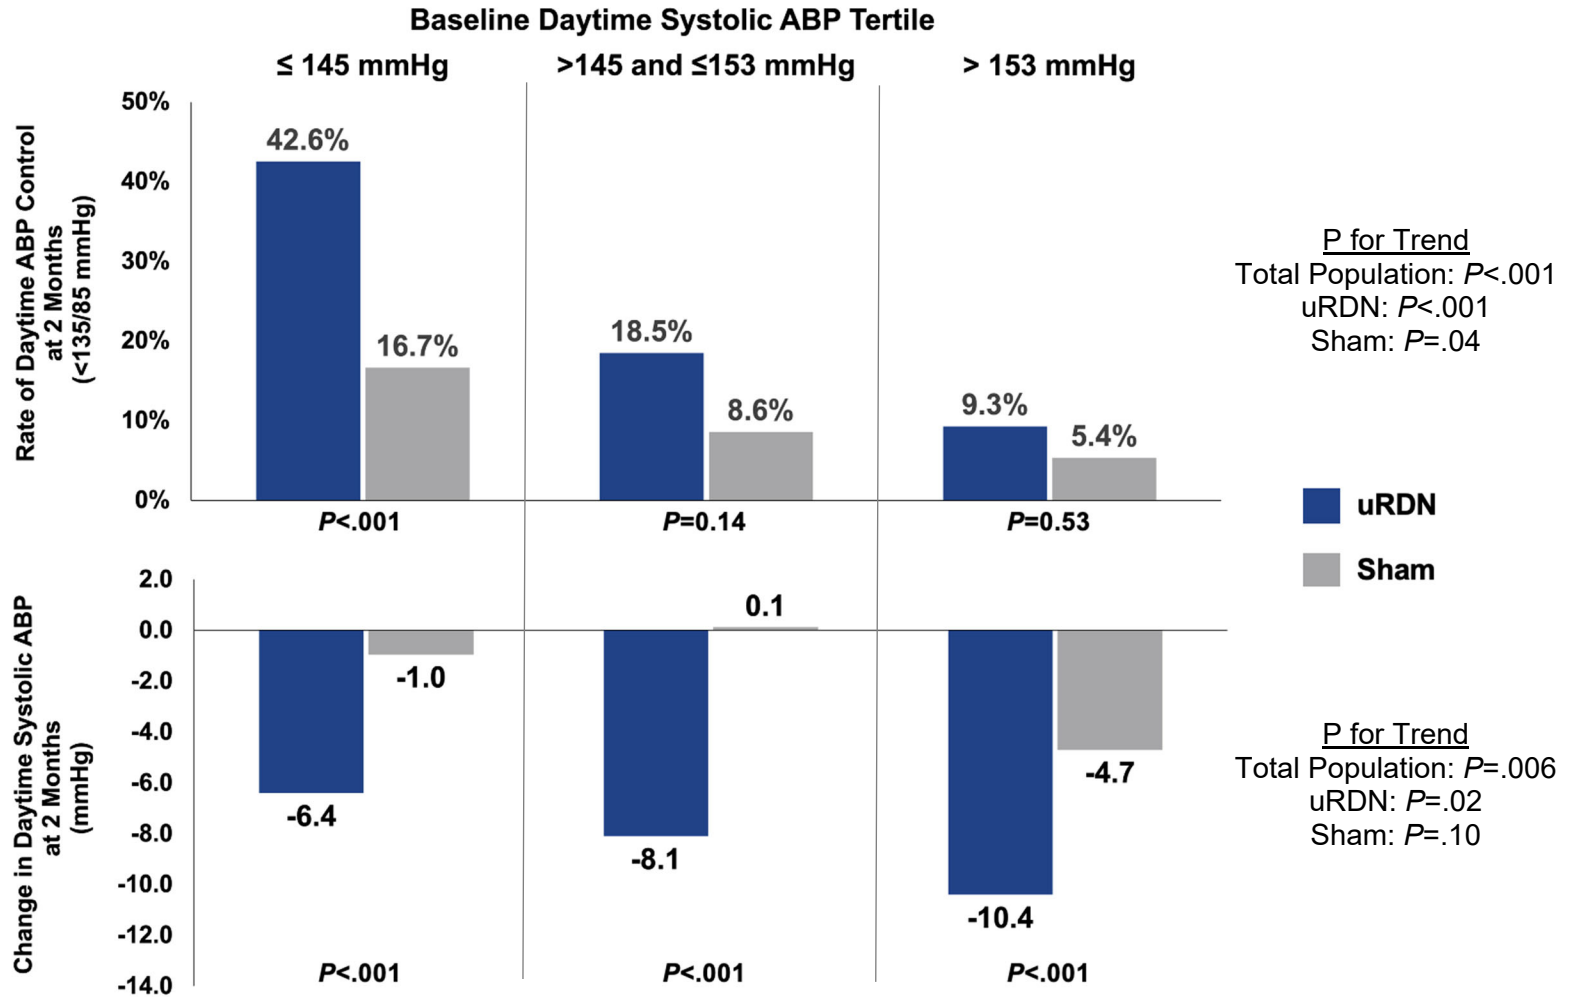

**eTable 1. Inclusion/Exclusion Criteria in Each Trial**

| Inclusion                                                                                                                                                                                                                                                                                                                                                                                                                                                                                                                                                                                                                                                                                                                                                                                                                                                                                                                                                                                                                                                                                                                                                                                          |                                                                                                                                                                                                                                                                                                                                                                                                                                                                                                                                                                                                                                                                                                                                                                                                                                                                                                                                                  |                                                                                                                                                                                                                                                                                                                                                                                                                                                                                                                                                                                                                                                                                                                                                                                                                                                                                                                                                                                                                                                                                                                                                                                                                         |
|----------------------------------------------------------------------------------------------------------------------------------------------------------------------------------------------------------------------------------------------------------------------------------------------------------------------------------------------------------------------------------------------------------------------------------------------------------------------------------------------------------------------------------------------------------------------------------------------------------------------------------------------------------------------------------------------------------------------------------------------------------------------------------------------------------------------------------------------------------------------------------------------------------------------------------------------------------------------------------------------------------------------------------------------------------------------------------------------------------------------------------------------------------------------------------------------------|--------------------------------------------------------------------------------------------------------------------------------------------------------------------------------------------------------------------------------------------------------------------------------------------------------------------------------------------------------------------------------------------------------------------------------------------------------------------------------------------------------------------------------------------------------------------------------------------------------------------------------------------------------------------------------------------------------------------------------------------------------------------------------------------------------------------------------------------------------------------------------------------------------------------------------------------------|-------------------------------------------------------------------------------------------------------------------------------------------------------------------------------------------------------------------------------------------------------------------------------------------------------------------------------------------------------------------------------------------------------------------------------------------------------------------------------------------------------------------------------------------------------------------------------------------------------------------------------------------------------------------------------------------------------------------------------------------------------------------------------------------------------------------------------------------------------------------------------------------------------------------------------------------------------------------------------------------------------------------------------------------------------------------------------------------------------------------------------------------------------------------------------------------------------------------------|
| RADIANCE-HTN SOLO                                                                                                                                                                                                                                                                                                                                                                                                                                                                                                                                                                                                                                                                                                                                                                                                                                                                                                                                                                                                                                                                                                                                                                                  | RADIANCE-HTN TRIO                                                                                                                                                                                                                                                                                                                                                                                                                                                                                                                                                                                                                                                                                                                                                                                                                                                                                                                                | RADIANCE II                                                                                                                                                                                                                                                                                                                                                                                                                                                                                                                                                                                                                                                                                                                                                                                                                                                                                                                                                                                                                                                                                                                                                                                                             |
| <ul style="list-style-type: none"> <li>• Appropriately signed and dated informed consent</li> <li>• Age <math>\geq 18</math> and <math>\leq 75</math> years at time of consent</li> <li>• Documented history of essential hypertension</li> <li>• Either,               <ul style="list-style-type: none"> <li>○ Average seated office BP <math>&lt; 180/110</math> mm Hg at screening visit (V0) while on a stable regimen of 1 or 2 antihypertensive medications for at least 4 weeks prior to consent or,</li> <li>○ Average seated office BP <math>\geq 140/90</math> mm Hg <math>&lt; 180/110</math> mm Hg despite lifestyle measures on no antihypertensive medications</li> </ul> </li> <li>• Documented daytime ABP <math>\geq 135/85</math> mm Hg and <math>&lt; 170/105</math> mm Hg after 4-week washout/run-in period</li> <li>• Suitable renal anatomy compatible with the renal denervation procedure and documented by renal CTA or MRA of good quality performed within one year prior to consent (a CTA or MRA will be obtained in patients without a recent (<math>\leq 1</math> year) renal imaging)</li> <li>• Able and willing to comply with all study procedures</li> </ul> | <ul style="list-style-type: none"> <li>• Appropriately signed and dated informed consent</li> <li>• Age <math>\geq 18</math> and <math>\leq 75</math> years at time of consent</li> <li>• Documented history of hypertension</li> <li>• Average seated office BP <math>\geq 140/90</math> mm Hg at screening visit (V0) while on a stable regimen of at least 3 antihypertensive medications of different classes including a diuretic for at least 4 weeks prior to consent</li> <li>• Documented daytime ABP <math>\geq 135/85</math> mm Hg after 4-week stabilization period</li> <li>• Suitable renal anatomy compatible with the renal denervation procedure and documented by renal CTA or MRA of good quality performed within one year prior to consent (a CTA or MRA will be obtained in patients without a recent (<math>\leq 1</math> year) renal imaging)</li> <li>• Able and willing to comply with all study procedures</li> </ul> | <ul style="list-style-type: none"> <li>• Appropriately signed and dated informed consent</li> <li>• Age <math>\geq 18</math> and <math>\leq 75</math> years at time of consent</li> <li>• Documented history of hypertension</li> <li>• Previously or currently prescribed antihypertensive therapy</li> <li>• Average seated office BP <math>\geq 140/90</math> mm Hg <math>&lt; 180/120</math> mm Hg at Screening Visit (V0) while stable for at least 4 weeks on 0-2 antihypertensive medications of different classes</li> <li>• Able and willing to comply with all study procedures</li> <li>• Documented daytime ABP <math>\geq 135/85</math> mm Hg and <math>&lt; 170/105</math> mm Hg at Baseline Visit (V1) after 4-week washout/run-in period</li> <li>• Suitable renal anatomy compatible with the renal denervation procedure and documented by renal CTA or MRA of good quality performed within one year prior to consent (a CTA or MRA will be obtained in patients without a recent (<math>\leq 1</math> year) cross-sectional renal imaging) confirmed by renal angiogram in subjects that continue to procedure (see Exclusion Criteria)</li> <li>• Sinus rhythm at the time of procedure</li> </ul> |

| Exclusion                                                                                                                                                                                                                                                                                                                                                                                                                                                                                                                                                                                                                                                                                                                                                                                                                                                                                                                                                                                                                                                                                                                                                                                                                                                                                                                                                                                                                                                                                                                                                                                                                                                               |                                                                                                                                                                                                                                                                                                                                                                                                                                                                                                                                                                                                                                                                                                                                                                                                                                                                                                                                                                                                                                                                                                                                                                                                                                                                                                                                                                                                                                                                                                                                                                                                                                                        |                                                                                                                                                                                                                                                                                                                                                                                                                                                                                                                                                                                                                                                                                                                                                                                                                                                                                                                                                                                                                                                                                                                                                                                                                                                                                                                                                                                                                                                                                                                                                                                                                                                                                                   |
|-------------------------------------------------------------------------------------------------------------------------------------------------------------------------------------------------------------------------------------------------------------------------------------------------------------------------------------------------------------------------------------------------------------------------------------------------------------------------------------------------------------------------------------------------------------------------------------------------------------------------------------------------------------------------------------------------------------------------------------------------------------------------------------------------------------------------------------------------------------------------------------------------------------------------------------------------------------------------------------------------------------------------------------------------------------------------------------------------------------------------------------------------------------------------------------------------------------------------------------------------------------------------------------------------------------------------------------------------------------------------------------------------------------------------------------------------------------------------------------------------------------------------------------------------------------------------------------------------------------------------------------------------------------------------|--------------------------------------------------------------------------------------------------------------------------------------------------------------------------------------------------------------------------------------------------------------------------------------------------------------------------------------------------------------------------------------------------------------------------------------------------------------------------------------------------------------------------------------------------------------------------------------------------------------------------------------------------------------------------------------------------------------------------------------------------------------------------------------------------------------------------------------------------------------------------------------------------------------------------------------------------------------------------------------------------------------------------------------------------------------------------------------------------------------------------------------------------------------------------------------------------------------------------------------------------------------------------------------------------------------------------------------------------------------------------------------------------------------------------------------------------------------------------------------------------------------------------------------------------------------------------------------------------------------------------------------------------------|---------------------------------------------------------------------------------------------------------------------------------------------------------------------------------------------------------------------------------------------------------------------------------------------------------------------------------------------------------------------------------------------------------------------------------------------------------------------------------------------------------------------------------------------------------------------------------------------------------------------------------------------------------------------------------------------------------------------------------------------------------------------------------------------------------------------------------------------------------------------------------------------------------------------------------------------------------------------------------------------------------------------------------------------------------------------------------------------------------------------------------------------------------------------------------------------------------------------------------------------------------------------------------------------------------------------------------------------------------------------------------------------------------------------------------------------------------------------------------------------------------------------------------------------------------------------------------------------------------------------------------------------------------------------------------------------------|
| RADIANCE-HTN SOLO                                                                                                                                                                                                                                                                                                                                                                                                                                                                                                                                                                                                                                                                                                                                                                                                                                                                                                                                                                                                                                                                                                                                                                                                                                                                                                                                                                                                                                                                                                                                                                                                                                                       | RADIANCE-HTN TRIO                                                                                                                                                                                                                                                                                                                                                                                                                                                                                                                                                                                                                                                                                                                                                                                                                                                                                                                                                                                                                                                                                                                                                                                                                                                                                                                                                                                                                                                                                                                                                                                                                                      | RADIANCE II                                                                                                                                                                                                                                                                                                                                                                                                                                                                                                                                                                                                                                                                                                                                                                                                                                                                                                                                                                                                                                                                                                                                                                                                                                                                                                                                                                                                                                                                                                                                                                                                                                                                                       |
| <ul style="list-style-type: none"> <li>• Renal artery anatomy on either side, ineligible for treatment including:               <ul style="list-style-type: none"> <li>○ Main renal artery diameter &lt; 4 mm and &gt; 8 mm</li> <li>○ Main renal artery length &lt; 25 mm</li> <li>○ A single functioning kidney</li> <li>○ Presence of abnormal kidney (or secreting adrenal) tumors</li> <li>○ Renal artery with aneurysm</li> <li>○ Pre-existing renal stent or history of renal artery angioplasty</li> <li>○ Prior renal denervation procedure</li> <li>○ Fibromuscular disease of the renal arteries</li> <li>○ Presence of renal artery stenosis of any origin <math>\geq 30\%</math></li> <li>○ Accessory arteries with diameter <math>\geq 2\text{mm}</math> &lt; 4 mm and &gt; 8 mm</li> </ul> </li> <li>• Iliac/femoral artery stenosis precluding insertion of the Paradise Catheter</li> <li>• Evidence of active infection within 7 days of procedure</li> <li>• Type I diabetes mellitus or uncontrolled Type II diabetes (defined as a plasma Hb1Ac <math>\geq 9.0\%</math>)</li> <li>• Documented history of chronic active inflammatory bowel disorders such as Crohn's disease or ulcerative colitis</li> <li>• eGFR of &lt;40 mL/min/1.73 m<sup>2</sup> (by Modification of Diet in Renal Disease formula)</li> <li>• Brachial circumference <math>\geq 42</math> cm</li> <li>• Any history of cerebrovascular event (e.g. stroke, transient ischemic event, cerebrovascular accident)</li> <li>• Any history of severe cardiovascular event (myocardial infarction, CABG, acute heart failure requiring hospitalization (NYHA III-IV))</li> </ul> | <ul style="list-style-type: none"> <li>• Renal artery anatomy on either side, ineligible for treatment including:               <ul style="list-style-type: none"> <li>○ Main renal artery diameter &lt; 3 mm or &gt; 8 mm</li> <li>○ Main renal treatable artery length &lt; 20 mm (may include proximal branching)</li> <li>○ A single functioning kidney</li> <li>○ Presence of abnormal kidney tumors</li> <li>○ Renal artery with aneurysm</li> <li>○ Pre-existing renal stent or history of renal artery angioplasty</li> <li>○ Pre-existing aortic stent or history of aortic aneurysm</li> <li>○ Prior renal denervation procedure</li> <li>○ Fibromuscular disease of the renal arteries</li> <li>○ Presence of renal artery stenosis of any origin <math>\geq 30\%</math></li> <li>○ Accessory arteries with diameter <math>\geq 2\text{mm}</math> &lt; 3 mm or &gt; 8 mm</li> </ul> </li> <li>• Iliac/femoral artery stenosis precluding insertion of the Paradise Catheter</li> <li>• Evidence of active infection within 7 days of procedure</li> <li>• Secondary hypertension not including sleep apnea (documented through clinical work up within the 12 months prior to consent- see Section 7.2.4.1)</li> <li>• Type I diabetes mellitus or uncontrolled Type II diabetes (defined as a plasma Hb1Ac <math>\geq 9.0\%</math>)</li> <li>• Documented history of chronic active inflammatory bowel disorders such as Crohn's disease or ulcerative colitis</li> <li>• eGFR of &lt;40 mL/min/1.73 m<sup>2</sup> (by Modification of Diet in Renal Disease formula)</li> <li>• Brachial circumference <math>\geq 42</math> cm</li> </ul> | <ul style="list-style-type: none"> <li>• Renal artery anatomy on either side, ineligible for treatment including:               <ul style="list-style-type: none"> <li>○ Main renal artery diameter &lt; 3 mm or &gt; 8 mm</li> <li>○ Main renal treatable artery length &lt; 20 mm (may include proximal branching)</li> <li>○ A single functioning kidney</li> <li>○ Presence of abnormal kidney tumors</li> <li>○ Renal artery with aneurysm</li> <li>○ Pre-existing renal stent or history of renal artery angioplasty</li> <li>○ Pre-existing aortic stent or history of aortic aneurysm</li> <li>○ Prior renal denervation procedure</li> <li>○ Fibromuscular disease of the renal arteries</li> <li>○ Presence of renal artery stenosis of any origin <math>\geq 30\%</math></li> <li>○ Accessory arteries with diameter <math>\geq 2\text{mm}</math> &lt; 3 mm or &gt; 8 mm</li> </ul> </li> <li>• Iliac/femoral artery stenosis precluding insertion of the Paradise Catheter</li> <li>• Known, uncorrected causes of secondary hypertension other than sleep apnea</li> <li>• Evidence of active infection within 7 days of procedure</li> <li>• Type I diabetes mellitus or uncontrolled Type II diabetes (defined as a plasma HbA1c <math>\geq 9.0\%</math>)</li> <li>• Documented history of chronic active inflammatory bowel disorders such as Crohn's disease or ulcerative colitis</li> <li>• eGFR of &lt;40 mL/min/1.73 m<sup>2</sup> (by Modification of Diet in Renal Disease formula)</li> <li>• Brachial circumference <math>\geq 42</math> cm</li> <li>• Any history of cerebrovascular event (e.g. stroke, transient ischemic event, cerebrovascular accident)</li> </ul> |

|                                                                                                                                                                                                                                                                                                                                                                                                                                                                                                                                                                                                                                                                                                                                                                                                                                                                                                                                                                                                                                                                                                                                                                                                                                                                                                                                                                                                                                                                                                                                                                                                  |                                                                                                                                                                                                                                                                                                                                                                                                                                                                                                                                                                                                                                                                                                                                                                                                                                                                                                                                                                                                                                                                                                                                                                                                                                                                                                                                                                                                                                                                                                                                                          |                                                                                                                                                                                                                                                                                                                                                                                                                                                                                                                                                                                                                                                                                                                                                                                                                                                                                                                                                                                                                                                                                                                                                                                                                                                                                                                                                                                                                                                                                                                                                                                                                           |
|--------------------------------------------------------------------------------------------------------------------------------------------------------------------------------------------------------------------------------------------------------------------------------------------------------------------------------------------------------------------------------------------------------------------------------------------------------------------------------------------------------------------------------------------------------------------------------------------------------------------------------------------------------------------------------------------------------------------------------------------------------------------------------------------------------------------------------------------------------------------------------------------------------------------------------------------------------------------------------------------------------------------------------------------------------------------------------------------------------------------------------------------------------------------------------------------------------------------------------------------------------------------------------------------------------------------------------------------------------------------------------------------------------------------------------------------------------------------------------------------------------------------------------------------------------------------------------------------------|----------------------------------------------------------------------------------------------------------------------------------------------------------------------------------------------------------------------------------------------------------------------------------------------------------------------------------------------------------------------------------------------------------------------------------------------------------------------------------------------------------------------------------------------------------------------------------------------------------------------------------------------------------------------------------------------------------------------------------------------------------------------------------------------------------------------------------------------------------------------------------------------------------------------------------------------------------------------------------------------------------------------------------------------------------------------------------------------------------------------------------------------------------------------------------------------------------------------------------------------------------------------------------------------------------------------------------------------------------------------------------------------------------------------------------------------------------------------------------------------------------------------------------------------------------|---------------------------------------------------------------------------------------------------------------------------------------------------------------------------------------------------------------------------------------------------------------------------------------------------------------------------------------------------------------------------------------------------------------------------------------------------------------------------------------------------------------------------------------------------------------------------------------------------------------------------------------------------------------------------------------------------------------------------------------------------------------------------------------------------------------------------------------------------------------------------------------------------------------------------------------------------------------------------------------------------------------------------------------------------------------------------------------------------------------------------------------------------------------------------------------------------------------------------------------------------------------------------------------------------------------------------------------------------------------------------------------------------------------------------------------------------------------------------------------------------------------------------------------------------------------------------------------------------------------------------|
| <ul style="list-style-type: none"> <li>• Documented confirmed episode(s) of stable or unstable angina</li> <li>• Documented repeat (&gt;1) hospitalization for hypertensive crisis within the prior 12 months</li> <li>• Prescribed to any standard antihypertensive or cardiovascular medication (e.g. beta blockers) for other chronic conditions (e.g. ischemic heart disease) such that discontinuation might pose serious risk to health</li> <li>• Documented history of persistent or permanent atrial tachyarrhythmia</li> <li>• Active implantable medical device (e.g. ICD or CRT-D; neuromodulator/spinal stimulator; baroreflex stimulator)</li> <li>• Chronic oxygen support or mechanical ventilation other than nocturnal respiratory support for sleep apnea.</li> <li>• Primary pulmonary hypertension</li> <li>• Documented contraindication or allergy to contrast medium not amenable to treatment</li> <li>• Limited life expectancy of &lt; 1 year at the discretion of the Investigator</li> <li>• Any known, unresolved history of drug use or alcohol dependency, lacks the ability to comprehend or follow instructions, or for any reason in the opinion of the investigator, would be unlikely or unable to comply with study protocol requirements or whose participation may result in data analysis confounders (e.g. night shift workers)</li> <li>• Pregnant, nursing or planning to become pregnant (documented negative pregnancy test required documented within a maximum of 7 days prior to procedure for all women of child bearing potential.</li> </ul> | <ul style="list-style-type: none"> <li>• Any history of cerebrovascular event (e.g. stroke, transient ischemic event, cerebrovascular accident) within 3 months prior to consent</li> <li>• Any history of severe cardiovascular event (myocardial infarction, CABG, acute heart failure requiring hospitalization (NYHA III-IV) within 3 months prior to consent</li> <li>• Documented confirmed episode(s) of unstable angina within 3 months prior to consent</li> <li>• Documented intolerance or contraindication for any of the antihypertensive drugs prescribed as a requirement of the study protocol</li> <li>• Documented repeat (&gt;1) hospitalization for hypertensive crisis within the prior 3 months</li> <li>• Prescribed to any standard anti-hypertensive CV medication (other than beta blockers) for other chronic conditions (e.g. ischemic heart disease) such that discontinuation might pose serious risk to health</li> <li>• Documented history of persistent or permanent atrial tachyarrhythmia</li> <li>• Active implantable medical device (e.g. ICD or CRT-D; neuromodulator/spinal stimulator; baroreflex stimulator)</li> <li>• Chronic oxygen support or mechanical ventilation other than nocturnal respiratory support for sleep apnea.</li> <li>• Primary pulmonary hypertension</li> <li>• Documented contraindication or allergy to contrast medium not amenable to treatment</li> <li>• Limited life expectancy of &lt; 1 year at the discretion of the Investigator</li> <li>• Night shift workers</li> </ul> | <ul style="list-style-type: none"> <li>• Any history of severe cardiovascular event (e.g. myocardial infarction, CABG, acute heart failure requiring hospitalization (NYHA III-IV)</li> <li>• Documented confirmed episode(s) of stable or unstable angina within 12 months prior to consent</li> <li>• Documented repeat (&gt;1) hospitalization for hypertensive crisis within the prior 12 months and/or any hospitalization for hypertensive crisis within three (3) months prior to consent</li> <li>• Prescribed to any standard antihypertensive or cardiovascular medication (e.g. beta blockers) for other chronic conditions (e.g. ischemic heart disease) such that discontinuation might pose serious risk to health in the opinion of the investigator</li> <li>• Documented history of persistent or permanent atrial tachyarrhythmia</li> <li>• Active implantable medical device (e.g. ICD or CRT-D; neuromodulator/spinal stimulator; baroreflex stimulator)</li> <li>• Chronic oxygen support or mechanical ventilation other than nocturnal respiratory support for sleep apnea.</li> <li>• Primary pulmonary hypertension</li> <li>• Documented contraindication or allergy to contrast medium not amenable to treatment</li> <li>• Limited life expectancy of &lt; 1 year at the discretion of the Investigator</li> <li>• Night shift workers</li> <li>• Any known, unresolved history of drug use or alcohol dependency, lacks the ability to comprehend or follow instructions, or for any reason in the opinion of the investigator, would be unlikely or unable to comply with study</li> </ul> |
|--------------------------------------------------------------------------------------------------------------------------------------------------------------------------------------------------------------------------------------------------------------------------------------------------------------------------------------------------------------------------------------------------------------------------------------------------------------------------------------------------------------------------------------------------------------------------------------------------------------------------------------------------------------------------------------------------------------------------------------------------------------------------------------------------------------------------------------------------------------------------------------------------------------------------------------------------------------------------------------------------------------------------------------------------------------------------------------------------------------------------------------------------------------------------------------------------------------------------------------------------------------------------------------------------------------------------------------------------------------------------------------------------------------------------------------------------------------------------------------------------------------------------------------------------------------------------------------------------|----------------------------------------------------------------------------------------------------------------------------------------------------------------------------------------------------------------------------------------------------------------------------------------------------------------------------------------------------------------------------------------------------------------------------------------------------------------------------------------------------------------------------------------------------------------------------------------------------------------------------------------------------------------------------------------------------------------------------------------------------------------------------------------------------------------------------------------------------------------------------------------------------------------------------------------------------------------------------------------------------------------------------------------------------------------------------------------------------------------------------------------------------------------------------------------------------------------------------------------------------------------------------------------------------------------------------------------------------------------------------------------------------------------------------------------------------------------------------------------------------------------------------------------------------------|---------------------------------------------------------------------------------------------------------------------------------------------------------------------------------------------------------------------------------------------------------------------------------------------------------------------------------------------------------------------------------------------------------------------------------------------------------------------------------------------------------------------------------------------------------------------------------------------------------------------------------------------------------------------------------------------------------------------------------------------------------------------------------------------------------------------------------------------------------------------------------------------------------------------------------------------------------------------------------------------------------------------------------------------------------------------------------------------------------------------------------------------------------------------------------------------------------------------------------------------------------------------------------------------------------------------------------------------------------------------------------------------------------------------------------------------------------------------------------------------------------------------------------------------------------------------------------------------------------------------------|

|                                                                                                                                                                                                                                                                                                   |                                                                                                                                                                                                                                                                                                                                                                                                                                                                                                                                                                                                                                                                                                                                                                                                                                        |                                                                                                                                                                                                                                                                                                                                                                                                                                                                                                                                                                                                                      |
|---------------------------------------------------------------------------------------------------------------------------------------------------------------------------------------------------------------------------------------------------------------------------------------------------|----------------------------------------------------------------------------------------------------------------------------------------------------------------------------------------------------------------------------------------------------------------------------------------------------------------------------------------------------------------------------------------------------------------------------------------------------------------------------------------------------------------------------------------------------------------------------------------------------------------------------------------------------------------------------------------------------------------------------------------------------------------------------------------------------------------------------------------|----------------------------------------------------------------------------------------------------------------------------------------------------------------------------------------------------------------------------------------------------------------------------------------------------------------------------------------------------------------------------------------------------------------------------------------------------------------------------------------------------------------------------------------------------------------------------------------------------------------------|
| <p>Documentation of effective contraception is also required for women of child bearing potential)</p> <ul style="list-style-type: none"> <li>• Concurrent enrollment in any other investigational drug or device trial (participation in non-interventional Registries is acceptable)</li> </ul> | <ul style="list-style-type: none"> <li>• Any known, unresolved history of drug use or alcohol dependency, lacks the ability to comprehend or follow instructions, or for any reason in the opinion of the investigator, would be unlikely or unable to comply with study protocol requirements or whose participation may result in data analysis confounders</li> <li>• Pregnant, nursing or planning to become pregnant (documented negative pregnancy test required documented within a maximum of 7 days prior to procedure for all women of child bearing potential. Documentation of effective contraception is also required for women of child bearing potential)</li> <li>• Concurrent enrollment in any other investigational drug or device trial (participation in non-interventional Registries is acceptable)</li> </ul> | <p>protocol requirements or whose participation may result in data analysis confounders</p> <ul style="list-style-type: none"> <li>• Pregnant, nursing or planning to become pregnant within 12 months post procedure. Negative pregnancy test required documented within a maximum of 7 days prior to procedure for all women of childbearing potential. Documentation of effective contraception is also required for women of childbearing potential</li> <li>• Concurrent enrollment in any other investigational drug or device trial (participation in non-interventional Registries is acceptable)</li> </ul> |
|---------------------------------------------------------------------------------------------------------------------------------------------------------------------------------------------------------------------------------------------------------------------------------------------------|----------------------------------------------------------------------------------------------------------------------------------------------------------------------------------------------------------------------------------------------------------------------------------------------------------------------------------------------------------------------------------------------------------------------------------------------------------------------------------------------------------------------------------------------------------------------------------------------------------------------------------------------------------------------------------------------------------------------------------------------------------------------------------------------------------------------------------------|----------------------------------------------------------------------------------------------------------------------------------------------------------------------------------------------------------------------------------------------------------------------------------------------------------------------------------------------------------------------------------------------------------------------------------------------------------------------------------------------------------------------------------------------------------------------------------------------------------------------|

**eTable 2. Blood Pressure Measurement Methods, Safety Escape Criteria, and Procedural Methods Used in All Studies**

|                                                                                                                                                                                                                                                                                                                                                                                                                                                                                                                                                                                                              |
|--------------------------------------------------------------------------------------------------------------------------------------------------------------------------------------------------------------------------------------------------------------------------------------------------------------------------------------------------------------------------------------------------------------------------------------------------------------------------------------------------------------------------------------------------------------------------------------------------------------|
| <b>Blood Pressure Measurement Methods:</b>                                                                                                                                                                                                                                                                                                                                                                                                                                                                                                                                                                   |
| <b>Office:</b><br>Attended seated office blood pressure and home blood pressure were measured s according to US and European guidelines, <sup>1,2</sup> as previously described. <sup>3,4</sup> After a rest period in the seated position, three office blood pressure measurements were taken one to two minutes apart with an adapted cuff to the arm circumference, with the last two readings averaged and used as the office blood pressure reading.                                                                                                                                                   |
| <b>Home:</b><br>Subjects were requested to measure their blood pressure at home after a 5-min rest in the sitting position in the morning and the evening (two blood pressure measurements one to two minutes apart) during seven consecutive days before every outpatient visit.                                                                                                                                                                                                                                                                                                                            |
| <b>Ambulatory:</b><br>Serial ambulatory blood pressure measurements were performed to assess initial eligibility and at 2-month post-randomization, as previously described. <sup>3,4</sup> Blood pressure was recorded every 20 minutes during daytime (07:00–22:00 hours) and every 30 minutes during nighttime (22:00–07:00 hours). The ambulatory blood pressure measurement was repeated if the number of daytime blood pressure measurements was less than 21. All ambulatory blood pressure recordings were sent to a core laboratory (dabl Ltd., Dublin, Ireland), with treatment assignment masked. |
| <b>Safety Escape Criteria:</b>                                                                                                                                                                                                                                                                                                                                                                                                                                                                                                                                                                               |
| In RADIANCE-HTN SOLO and RADIANCE-HTN TRIO, escape criteria was met if either Home BP exceeded 170/105 mmHg or Office BP exceeded 180/110 mmHg in conjunction with an adverse event.<br><br>In RADIANCE II, escape criteria was met if both Home BP exceeded 170/105 mmHg and Office BP exceeded 180/110 mmHg in conjunction with an adverse event. However, if either home or office were not available, the available measurement could be used on its own to make a determination.                                                                                                                        |
| <b>Ultrasound Renal Denervation Procedure Methods:</b>                                                                                                                                                                                                                                                                                                                                                                                                                                                                                                                                                       |
| Renal nerve ablation was performed with the Paradise™ endovascular ultrasound renal denervation system (ReCor Medical, Inc., Palo Alto, CA, USA). According to individual treatment plans developed based on the pre-randomization CT- or MR-angiography and following selective renal angiography, a minimum of two non-overlapping sonications were delivered in the main right and left renal arteries and at least one sonication was delivered in accessory arteries. Treatable artery sizes in TRIO and RADIANCE II were ≥3 mm and ≤8 mm. Treatable artery sizes in SOLO were ≥4 mm and ≤8 mm.         |



**eTable 3.** Pooled Procedural Data Across Studies

| Characteristic                                                                                                                | uRDN<br>(n = 293) | Sham<br>(n = 213) |
|-------------------------------------------------------------------------------------------------------------------------------|-------------------|-------------------|
| Procedure time (sheath removal – sheath insertion) (min)                                                                      | 78.1 ± 25.8       | 41.8 ± 15.7       |
| Device time (catheter out - catheter in) (min) <sup>a</sup>                                                                   | 35.3 ± 20.1       | NA                |
| Total Emission Time (seconds) <sup>b</sup>                                                                                    | 38.9 ± 7.8        | NA                |
| Sedation                                                                                                                      |                   |                   |
| Conscious Sedation (e.g. midazolam, fentanyl, and/or morphine)                                                                | 227/293 (77.4%)   | 161/212 (75.9%)   |
| Monitored Anesthesia Care (e.g. propofol)                                                                                     | 21/293 (7.2%)     | 13/212 (6.1%)     |
| General Anesthesia (e.g. inhaled anesthetics, muscle relaxants or neuromuscular blocking agents, intubation, and/or ketamine) | 45/293 (15.4%)    | 38/212 (17.9%)    |
| Contrast volume <sup>c</sup> (cm <sup>3</sup> )                                                                               | 146.7 ± 71.9      | 74.2 ± 37.9       |
| Fluoroscopy time <sup>d</sup> (min)                                                                                           | 16.2 ± 9.2        | 4.4 ± 7.9         |
| Total Number of Sonications <sup>b</sup>                                                                                      | 5.6 ± 1.1         | NA                |
| Left <sup>b</sup>                                                                                                             | 2.7 ± 0.7         | NA                |
| Right <sup>b</sup>                                                                                                            | 2.9 ± 0.7         | NA                |
| Subjects with Treated Renal Accessory or Proximal Side Branch                                                                 | 56/293 (19.1%)    | NA                |
| Treatment successfully delivered (minimum 2 emissions bilaterally)                                                            | 286/293 (97.6%)   | NA                |

Data displayed as either n/N (%) or Mean ± SD.

<sup>a</sup>There were 5 patients in the uRDN group missing device time.

<sup>b</sup>There were two patients in the uRDN group receiving no treatment that were not included.

<sup>c</sup>There were two patients in the uRDN group and two in the sham group missing contrast volume.

<sup>d</sup>There were four patients in the uRDN group and four patients in the sham group missing fluoroscopy time.

**eTable 4.** Change in Ambulatory, Office, and Home Blood Pressure at 2 Months in the Ultrasound Renal Denervation Group (uRDN) and in the Sham Group in the Intention to Treat Population (n = 293 uRDN, n = 213 sham)

|                                   | uRDN          |              |              | Sham          |              |             | Study and Baseline Adjusted with Multiple Imputation |                             |
|-----------------------------------|---------------|--------------|--------------|---------------|--------------|-------------|------------------------------------------------------|-----------------------------|
|                                   | Randomization | 2 months     | Difference   | Randomization | 2 months     | Difference  | Group Difference (95% CI) <sup>a</sup>               | P value <sup>c</sup>        |
| <b>SBP Parameters (mm Hg)</b>     |               |              |              |               |              |             |                                                      |                             |
| Daytime Ambulatory <sup>e</sup>   | 150.3 ± 9.3   | 141.8 ± 13.8 | -8.5 ± 11.9  | 150.8 ± 10.5  | 147.9 ± 14.6 | -2.9 ± 12.1 | -5.9 (-8.1, -3.8)<br>-6.2 (-8.0, -4.5) <sup>b</sup>  | <.001<br><.001 <sup>d</sup> |
| 24 Hour Ambulatory <sup>f</sup>   | 143.3 ± 10.1  | 135.3 ± 13.5 | -7.9 ± 11.1  | 144.4 ± 11.2  | 141.3 ± 14.0 | -3.1 ± 12.2 | -5.3 (-7.4, -3.3)<br>-5.4 (-7.1, -3.6) <sup>b</sup>  | <.001<br><.001 <sup>d</sup> |
| Nighttime Ambulatory <sup>f</sup> | 132.1 ± 14.0  | 125.4 ± 15.3 | -6.7 ± 13.4  | 134.2 ± 15.4  | 131.2 ± 15.8 | -3.0 ± 14.5 | -4.7 (-7.0, -2.4)<br>-4.3 (-6.5, -2.0) <sup>b</sup>  | <.001<br><.001 <sup>d</sup> |
| Home <sup>g</sup>                 | 151.0 ± 11.3  | 142.7 ± 13.8 | -8.4 ± 11.0  | 150.1 ± 13.5  | 148.6 ± 16.0 | -1.4 ± 9.4  | -6.8 (-8.7, -4.9)<br>-7.1 (-9.0, -5.5) <sup>b</sup>  | <.001<br><.001 <sup>d</sup> |
| Office <sup>h</sup>               | 155.9 ± 13.9  | 145.5 ± 17.1 | -10.4 ± 15.0 | 155.0 ± 15.2  | 151.6 ± 18.6 | -3.4 ± 16.7 | -6.4 (-9.1, -3.6)<br>-7.5 (-10.0, -5.0) <sup>b</sup> | <.001<br><.001 <sup>d</sup> |
| <b>DBP Parameters (mm Hg)</b>     |               |              |              |               |              |             |                                                      |                             |
| Daytime Ambulatory <sup>e</sup>   | 93.6 ± 5.8    | 88.2 ± 8.6   | -5.5 ± 7.1   | 93.7 ± 6.9    | 91.1 ± 9.1   | -2.6 ± 7.8  | -3.0 (-4.3, -1.7)<br>-3.1 (-4.3, -2.0) <sup>b</sup>  | <.001<br><.001 <sup>d</sup> |
| 24 Hour Ambulatory <sup>f</sup>   | 88.2 ± 6.3    | 83.1 ± 8.4   | -5.2 ± 6.9   | 88.6 ± 7.1    | 86.1 ± 8.7   | -2.6 ± 7.8  | -2.8 (-4.1, -1.6)<br>-3.0 (-4.0, -1.9) <sup>b</sup>  | <.001<br><.001 <sup>d</sup> |
| Nighttime Ambulatory <sup>f</sup> | 79.7 ± 9.0    | 75.2 ± 10.1  | -4.5 ± 8.8   | 80.5 ± 9.5    | 78.4 ± 10.0  | -2.0 ± 9.3  | -2.9 (-4.4, -1.4)<br>-3.0 (-4.5, -1.5) <sup>b</sup>  | <.001<br><.001 <sup>d</sup> |
| Home <sup>g</sup>                 | 96.7 ± 7.8    | 92.1 ± 9.6   | -4.6 ± 6.7   | 95.7 ± 8.8    | 95.0 ± 10.0  | -0.6 ± 5.7  | -3.8 (-5.0, -2.6)<br>-4.0 (-5.1, -3.0) <sup>b</sup>  | <.001<br><.001 <sup>d</sup> |
| Office <sup>h</sup>               | 101.2 ± 8.8   | 95.7 ± 11.2  | -5.5 ± 10.3  | 100.0 ± 9.4   | 98.6 ± 11.7  | -1.4 ± 10.4 | -3.5 (-5.3, -1.7)<br>-4.0 (-6.0, -2.5) <sup>b</sup>  | <.001<br><.001 <sup>d</sup> |

Data displayed as mean ± SD unless otherwise specified. DBP=diastolic blood pressure, SBP=systolic blood pressure

<sup>a</sup>Estimate of treatment difference, from study and baseline adjusted ANCOVA with multiple imputation.

<sup>b</sup>In the event that change from baseline in either cohort is non-normal, the Hodges-Lehmann estimator of location shift and associated 95% confidence interval (observed data) is also provided.

<sup>c</sup>P value from study and baseline adjusted ANCOVA with multiple imputation.

<sup>d</sup>In the event that change from baseline in either cohort is non-normal, the P value from a study and baseline adjusted ANCOVA on the ranks (observed data) is also provided.

<sup>e</sup>There were 281 patients in RDN group and 211 patients in the sham group with daytime ambulatory BP measurements.

<sup>f</sup>There were 280 patients in RDN group and 209 patients in the sham group with 24hr ambulatory and nighttime ambulatory BP measurements.

<sup>g</sup>There were 271 patients in RDN group and 205 patients in the sham group with home BP measurements.

<sup>h</sup>There were 275 patients in RDN group and 209 patients in the sham group with office BP measurements.

**eTable 5.** Change in Ambulatory, Office, and Home Blood Pressure at 2 Months in the Ultrasound Renal Denervation Group (uRDN) and in the Sham Group in the Per-Protocol Population (n = 250 uRDN, n = 178 Sham)

|                                   | uRDN          |              |              | Sham          |              |             | Study and Baseline Adjusted with Multiple Imputation |                             |
|-----------------------------------|---------------|--------------|--------------|---------------|--------------|-------------|------------------------------------------------------|-----------------------------|
|                                   | Randomization | 2 months     | Difference   | Randomization | 2 months     | Difference  | Group Difference (95% CI) <sup>a</sup>               | P value <sup>c</sup>        |
| <b>SBP Parameters (mm Hg)</b>     |               |              |              |               |              |             |                                                      |                             |
| Daytime Ambulatory <sup>e</sup>   | 150.0 ± 9.2   | 141.7 ± 14.0 | -8.3 ± 12.0  | 149.9 ± 10.2  | 147.9 ± 14.3 | -2.0 ± 11.7 | -6.5 (-8.8, -4.2)<br>-7.0 (-9.0, -5.1) <sup>b</sup>  | <.001<br><.001 <sup>d</sup> |
| 24 Hour Ambulatory <sup>f</sup>   | 142.8 ± 9.9   | 135.1 ± 13.6 | -7.7 ± 11.1  | 143.3 ± 11.0  | 141.1 ± 13.9 | -2.2 ± 11.8 | -5.8 (-8.8, -3.7)<br>-6.1 (-8.0, -4.2) <sup>b</sup>  | <.001<br><.001 <sup>d</sup> |
| Nighttime Ambulatory <sup>f</sup> | 131.4 ± 13.7  | 125.1 ± 15.4 | -6.3 ± 13.4  | 132.9 ± 15.2  | 130.9 ± 15.8 | -2.0 ± 14.5 | -5.1 (-7.6, -2.6)<br>-5.0 (-7.3, -2.6) <sup>b</sup>  | <.001<br><.001 <sup>d</sup> |
| Home <sup>g</sup>                 | 150.5 ± 10.6  | 142.3 ± 13.8 | -8.2 ± 10.8  | 148.9 ± 13.0  | 147.7 ± 14.6 | -1.2 ± 8.6  | -6.7 (-8.7, -4.7)<br>-7.2 (-9.0, -5.4) <sup>b</sup>  | <.001<br><.001 <sup>d</sup> |
| Office <sup>h</sup>               | 155.5 ± 14.1  | 145.4 ± 17.2 | -10.1 ± 14.8 | 154.0 ± 15.3  | 151.1 ± 17.9 | -2.9 ± 16.4 | -6.4 (-9.3, -3.5)<br>-8.0 (-11.0, -5.5) <sup>b</sup> | <.001<br><.001 <sup>d</sup> |
| <b>DBP Parameters (mm Hg)</b>     |               |              |              |               |              |             |                                                      |                             |
| Daytime Ambulatory <sup>e</sup>   | 93.8 ± 5.6    | 88.4 ± 8.7   | -5.4 ± 7.1   | 93.5 ± 6.8    | 91.4 ± 9.0   | -2.1 ± 7.8  | -3.4 (-4.8, -2.0)<br>-3.7 (-4.9, -2.4) <sup>b</sup>  | <.001<br><.001 <sup>d</sup> |
| 24 Hour Ambulatory <sup>f</sup>   | 88.3 ± 6.1    | 83.2 ± 8.5   | -5.2 ± 6.9   | 88.3 ± 7.0    | 86.2 ± 8.6   | -2.1 ± 7.8  | -3.2 (-4.6, -1.8)<br>-3.3 (-4.5, -2.1) <sup>b</sup>  | <.001<br><.001 <sup>d</sup> |
| Nighttime Ambulatory <sup>f</sup> | 79.7 ± 8.8    | 75.1 ± 10.2  | -4.5 ± 9.0   | 80.1 ± 9.3    | 78.5 ± 9.9   | -1.6 ± 9.4  | -3.3 (-4.9, -1.6)<br>-3.4 (-5.0, -2.0) <sup>b</sup>  | <.001<br><.001 <sup>d</sup> |
| Home <sup>g</sup>                 | 96.8 ± 7.7    | 92.3 ± 9.7   | -4.5 ± 6.6   | 95.3 ± 8.7    | 94.6 ± 9.6   | -0.7 ± 5.3  | -3.6 (-4.9, -2.4)<br>-4.0 (-5.1, -3.0) <sup>b</sup>  | <.001<br><.001 <sup>d</sup> |
| Office <sup>h</sup>               | 101.3 ± 8.6   | 95.8 ± 11.0  | -5.5 ± 10.0  | 99.5 ± 9.6    | 98.5 ± 11.5  | -1.0 ± 10.2 | -3.6 (-5.5, -1.7)<br>-5.0 (-6.5, -3.0) <sup>b</sup>  | <.001<br><.001 <sup>d</sup> |

Data displayed as mean ± SD unless otherwise specified. DBP=diastolic blood pressure, SBP=systolic blood pressure

<sup>a</sup>Estimate of treatment difference, from study and baseline adjusted ANCOVA.

<sup>b</sup>In the event that change from baseline in either cohort is non-normal, the Hodges-Lehmann estimator of location shift and associated 95% confidence interval (observed data) is also provided

<sup>c</sup>P value from study and baseline adjusted ANCOVA.

<sup>d</sup>In the event that change from baseline in either cohort is non-normal, the P value from a study and baseline adjusted ANCOVA on the ranks (observed data) is also provided.

<sup>e</sup>There were 250 patients in RDN group and 178 patients in the sham group with daytime ambulatory BP measurements.

<sup>f</sup>There were 249 patients in RDN group and 177 patients in the sham group with 24hr ambulatory and nighttime ambulatory BP measurements.

<sup>g</sup>There were 239 patients in RDN group and 170 patients in the sham group with home blood pressure measurements.

<sup>h</sup>There were 239 patients in RDN group and 175 patients in the sham group with office blood pressure measurements.

**eTable 6.** Change in Ambulatory, Office, and Home Blood Pressure at 2 Months in the Ultrasound Renal Denervation Group (uRDN) and in the Sham Group in the Complete Ambulatory Blood Pressure Population (n = 281 uRDN, n = 211 sham)

|                                   | uRDN          |              |              | Sham          |              |             | Study and Baseline Adjusted with Multiple Imputation |                             |
|-----------------------------------|---------------|--------------|--------------|---------------|--------------|-------------|------------------------------------------------------|-----------------------------|
|                                   | Randomization | 2 months     | Difference   | Randomization | 2 months     | Difference  | Group Difference (95% CI) <sup>a</sup>               | P value <sup>c</sup>        |
| <b>SBP Parameters (mm Hg)</b>     |               |              |              |               |              |             |                                                      |                             |
| Daytime Ambulatory <sup>e</sup>   | 150.3 ± 9.3   | 141.8 ± 13.8 | -8.5 ± 11.9  | 150.8 ± 10.5  | 147.9 ± 14.6 | -2.9 ± 12.1 | -6.0 (-8.1, -3.8)<br>-6.2 (-8.0, -4.5) <sup>b</sup>  | <.001<br><.001 <sup>d</sup> |
| 24 Hour Ambulatory <sup>f</sup>   | 143.3 ± 10.1  | 135.3 ± 13.5 | -7.9 ± 11.1  | 144.4 ± 11.2  | 141.3 ± 14.0 | -3.1 ± 12.2 | -5.3 (-7.4, -3.3)<br>-5.4 (-7.1, -3.6) <sup>b</sup>  | <.001<br><.001 <sup>d</sup> |
| Nighttime Ambulatory <sup>f</sup> | 132.1 ± 14.0  | 125.4 ± 15.3 | -6.7 ± 13.4  | 134.2 ± 15.4  | 131.2 ± 15.8 | -3.0 ± 14.5 | -4.7 (-7.0, -2.4)<br>-4.3 (-6.5, -2.0) <sup>b</sup>  | <.001<br><.001 <sup>d</sup> |
| Home <sup>g</sup>                 | 151.1 ± 11.3  | 142.7 ± 13.8 | -8.4 ± 10.9  | 150.0 ± 13.5  | 148.7 ± 16.0 | -1.3 ± 9.2  | -7.0 (-8.9, -5.1)<br>-7.3 (-9.0, -5.6) <sup>b</sup>  | <.001<br><.001 <sup>d</sup> |
| Office <sup>h</sup>               | 155.9 ± 14.0  | 145.5 ± 17.2 | -10.4 ± 15.1 | 155.0 ± 15.2  | 151.7 ± 18.6 | -3.4 ± 16.7 | -6.5 (-9.3, -3.7)<br>-8.0 (-10.5, -5.0) <sup>b</sup> | <.001<br><.001 <sup>d</sup> |
| <b>DBP Parameters (mm Hg)</b>     |               |              |              |               |              |             |                                                      |                             |
| Daytime Ambulatory <sup>e</sup>   | 93.6 ± 5.8    | 88.2 ± 8.6   | -5.5 ± 7.1   | 93.7 ± 6.9    | 91.1 ± 9.1   | -2.6 ± 7.8  | -3.0 (-4.4, -1.7)<br>-3.1 (-4.3, -2.0) <sup>b</sup>  | <.001<br><.001 <sup>d</sup> |
| 24 Hour Ambulatory <sup>f</sup>   | 88.2 ± 6.3    | 83.1 ± 8.4   | -5.2 ± 6.9   | 88.6 ± 7.1    | 86.1 ± 8.7   | -2.6 ± 7.8  | -2.8 (-4.1, -1.6)<br>-3.0 (-4.0, -1.9) <sup>b</sup>  | <.001<br><.001 <sup>d</sup> |
| Nighttime Ambulatory <sup>f</sup> | 79.7 ± 9.0    | 75.2 ± 10.1  | -4.5 ± 8.8   | 80.5 ± 9.5    | 78.4 ± 10.0  | -2.0 ± 9.3  | -2.9 (-4.4, -1.4)<br>-3.0 (-4.5, -1.5) <sup>b</sup>  | <.001<br><.001 <sup>d</sup> |
| Home <sup>g</sup>                 | 96.8 ± 7.8    | 92.2 ± 9.7   | -4.6 ± 6.7   | 95.7 ± 8.8    | 95.1 ± 10.1  | -0.6 ± 5.7  | -3.9 (-5.1, -2.7)<br>-4.1 (-5.2, -3.0) <sup>b</sup>  | <.001<br><.001 <sup>d</sup> |
| Office <sup>h</sup>               | 101.3 ± 8.8   | 95.7 ± 11.3  | -5.6 ± 10.3  | 100.0 ± 9.4   | 98.7 ± 11.7  | -1.3 ± 10.4 | -3.6 (-5.4, -1.8)<br>-4.5 (-6.0, -3.0) <sup>b</sup>  | <.001<br><.001 <sup>d</sup> |

Data displayed as mean ± SD unless otherwise specified. DBP=diastolic blood pressure, SBP=systolic blood pressure

<sup>a</sup>Estimate of treatment difference, from study and baseline adjusted ANCOVA.

<sup>b</sup>In the event that change from baseline in either cohort is non-normal, the Hodges-Lehmann estimator of location shift and associated 95% confidence interval (observed data) is also provided

<sup>c</sup>P value from study and baseline adjusted ANCOVA.

<sup>d</sup>In the event that change from baseline in either cohort is non-normal, the P value from a study and baseline adjusted ANCOVA on the ranks (observed data) is also provided.

<sup>e</sup>There were 281 patients in RDN group and 211 patients in the sham group with daytime ambulatory BP measurements.

<sup>f</sup>There were 280 patients in RDN group and 209 patients in the sham group with 24hr ambulatory and nighttime ambulatory BP measurements.

<sup>g</sup> There were 268 patients in RDN group and 203 patients in the sham group with home BP measurements.

<sup>h</sup> There were 270 patients in RDN group and 208 patients in the sham group with office BP measurements.

**eTable 7.** Proportion of Patients with Drops in Daytime Ambulatory, 24-Hour Ambulatory, Nighttime Ambulatory, and Home Systolic BP of  $\geq 5$ ,  $\geq 10$ ,  $\geq 15$  and  $\geq 20$  mm Hg in the Intention-to-Treat Population

| Blood Pressure Drop                           | uRDN<br>(n = 293) | Sham<br>(n=213) | P value <sup>b</sup> |
|-----------------------------------------------|-------------------|-----------------|----------------------|
| Daytime Ambulatory Systolic BP <sup>a</sup>   |                   |                 |                      |
| $\geq 5$ mm Hg                                | 184/281 (65.5%)   | 77/211 (36.5%)  | <.001                |
| $\geq 10$ mm Hg                               | 130/281 (46.3%)   | 42/211 (19.9%)  | <.001                |
| $\geq 15$ mm Hg                               | 77/281 (27.4%)    | 25/211 (11.8%)  | <.001                |
| $\geq 20$ mm Hg                               | 38/281 (13.5%)    | 17/211 (8.1%)   | .04                  |
| 24-hr Ambulatory Systolic BP <sup>a</sup>     |                   |                 |                      |
| $\geq 5$ mm Hg                                | 172/280 (61.4%)   | 80/209 (38.3%)  | <.001                |
| $\geq 10$ mm Hg                               | 123/280 (43.9%)   | 49/209 (23.4%)  | <.001                |
| $\geq 15$ mm Hg                               | 71/280 (25.4%)    | 25/209 (12.0%)  | <.001                |
| $\geq 20$ mm Hg                               | 31/280 (11.1%)    | 13/209 (6.2%)   | .04                  |
| Nighttime Ambulatory Systolic BP <sup>a</sup> |                   |                 |                      |
| $\geq 5$ mm Hg                                | 160/280 (57.1%)   | 84/209 (40.2%)  | <.001                |
| $\geq 10$ mm Hg                               | 113/280 (40.4%)   | 56/209 (26.8%)  | .001                 |
| $\geq 15$ mm Hg                               | 73/280 (26.1%)    | 36/209 (17.2%)  | .01                  |
| $\geq 20$ mm Hg                               | 42/280 (15.0%)    | 22/209 (10.5%)  | .12                  |
| Home Systolic BP <sup>a</sup>                 |                   |                 |                      |
| $\geq 5$ mm Hg                                | 175/271 (64.6%)   | 65/205 (31.7%)  | <.001                |
| $\geq 10$ mm Hg                               | 115/271 (42.4%)   | 34/205 (16.6%)  | <.001                |
| $\geq 15$ mm Hg                               | 67/271 (24.7%)    | 16/205 (7.8%)   | <.001                |
| $\geq 20$ mm Hg                               | 37/271 (13.7%)    | 10/205 (4.9%)   | .001                 |

Data displayed as n/N (%).

<sup>a</sup>Data are cumulative (e.g., subjects included in  $\geq 10$  mm Hg row are also included in  $\geq 5$  mm Hg row).

<sup>b</sup>P value from Cochran-Mantel-Haenszel test, stratified by study.

**eTable 8.** Hypertension Control Rates at 2 Months

| <b>ITT Population</b>                                                                           |                         |                         |                            |
|-------------------------------------------------------------------------------------------------|-------------------------|-------------------------|----------------------------|
| <b>Definition</b>                                                                               | <b>uRDN<br/>(n=293)</b> | <b>Sham<br/>(n=213)</b> | <b>P value<sup>a</sup></b> |
| Daytime ambulatory BP <135/85 mmHg                                                              | 68/281 (24.2%)          | 26/211 (12.3%)          | <.001                      |
| 24-hour ambulatory BP <130/80 mmHg                                                              | 74/280 (26.4%)          | 25/210 (11.9%)          | <.001                      |
| Home BP <135/85 mmHg                                                                            | 43/274 (15.7%)          | 13/205 (6.3%)           | <.001                      |
| Office BP <140/90 mmHg                                                                          | 64/275 (23.3%)          | 35/209 (16.7%)          | .09                        |
| <b>ITT Population – Control Rates in the Absence of Additional Antihypertensive Medications</b> |                         |                         |                            |
| <b>Definition</b>                                                                               | <b>uRDN<br/>(n=293)</b> | <b>Sham<br/>(n=213)</b> | <b>P value<sup>a</sup></b> |
| Daytime ambulatory BP <135/85 mmHg                                                              | 63/281 (22.4%)          | 19/211 (9.0%)           | <.001                      |
| 24-hour ambulatory BP <130/80 mmHg                                                              | 69/280 (24.6%)          | 20/211 (9.5%)           | <.001                      |
| Home BP <135/85 mmHg                                                                            | 42/275 (15.3%)          | 8/205 (3.9%)            | <.001                      |
| Office BP <140/90 mmHg                                                                          | 59/275 (21.5%)          | 30/209 (14.4%)          | .06                        |

Data displayed as % (n/N).

<sup>a</sup>P-value from Chi-square or Fishers exact test, as appropriate, comparing treatment arm to sham arm.



**eTable 9.** Multivariable Analysis of Daytime Ambulatory Systolic Blood Pressure in the Ultrasound Renal Denervation Group Only in the Intention-to-Treat Population

| Independent Variables                                                       | Estimate (Standard Error) | P value <sup>a</sup> |
|-----------------------------------------------------------------------------|---------------------------|----------------------|
| Study                                                                       |                           | .17                  |
| RII Study (vs TRIO)                                                         | 3.51 (1.92)               | .07                  |
| SOLO Study (vs TRIO)                                                        | 1.92 (2.16)               | .37                  |
| Female (vs Male)                                                            | -1.23 (1.58)              | .44                  |
| Black (vs non-black)                                                        | -0.52 (2.02)              | .80                  |
| Age, years (1 unit increase)                                                | 0.11 (0.08)               | .13                  |
| Baseline Daytime Ambulatory Systolic Blood Pressure, mmHg (1 unit increase) | -0.25 (0.08)              | .001                 |
| Baseline 24-hr ABP Heart Rate < 74 (median) (vs. ≥74)                       | 3.62 (1.44)               | .01                  |
| Baseline eGFR < 60ml/min/1.73 m <sup>2</sup> (vs. ≥60)                      | -5.76 (3.34)              | .09                  |
| US (vs. OUS)                                                                | -1.68 (1.53)              | .27                  |
| Abdominal obesity (vs. Normal)                                              | 1.49 (1.53)               | .33                  |
| Orthostatic HTN (vs. No Orthostatic HTN)                                    | -4.41 (1.81)              | .02                  |
| Sleep Apnea (vs. No Sleep Apnea)                                            | -0.63 (1.97)              | .75                  |

<sup>a</sup>P value from multiple linear regression. P value for 'Study' row is based on the Type 3 P value testing across the 3 levels of the variable.

**eTable 10.** Changes in Kidney Function at 2 Months in Patients With Matched Data at Baseline and 2 Months (n = 273 uRDN and n = 207 Sham)

|                                                          | uRDN          |             |            | Sham          |             |            | Study and Baseline Adjusted Observed              |                         |
|----------------------------------------------------------|---------------|-------------|------------|---------------|-------------|------------|---------------------------------------------------|-------------------------|
|                                                          | Randomization | 2 months    | Difference | Randomization | 2 months    | Difference | Group Difference (95% CI) <sup>a</sup>            | P value <sup>c</sup>    |
| <b>eGFR<sup>e</sup></b><br>(mL/min/1.73 m <sup>2</sup> ) | 83.8 ± 18.0   | 84.4 ± 16.7 | 0.6 ± 10.8 | 82.4 ± 16.6   | 82.9 ± 16.8 | 0.6 ± 9.5  | 0.4 (-1.4, 2.2)<br>0.0 (-1.8, 1.6) <sup>b</sup>   | .65<br>.97 <sup>d</sup> |
| <b>Serum Creatinine</b><br>(mg/dL)                       | 0.9 ± 0.2     | 0.9 ± 0.2   | -0.0 ± 0.1 | 0.9 ± 0.2     | 0.9 ± 0.2   | 0.0 ± 0.1  | -0.0 (-0.0, 0.0)<br>-0.0 (-0.0, 0.0) <sup>b</sup> | .34<br>.80 <sup>d</sup> |

Data displayed as mean ± SD unless otherwise specified.

<sup>a</sup>Estimate of treatment difference, from study and baseline adjusted ANCOVA.

<sup>b</sup>In the event that change from baseline in either cohort is non-normal, the Hodges-Lehmann estimator of location shift and associated 95% confidence interval (observed data) is also provided.

<sup>c</sup>P value from study and baseline adjusted ANCOVA.

<sup>d</sup>In the event that change from baseline in either cohort is non-normal, the p-value from a study and baseline adjusted ANCOVA on the ranks (observed data) is also provided.

<sup>e</sup>Calculated using MDRD formula. There is one subject in the uRDN group and one subject in the sham group that had serum creatinine but are missing eGFR.

## 5. eReferences

1. Whelton PK, Carey RM, Aronow WS, et al. 2017 ACC/AHA/AAPA/ABC/ACPM/AGS/APhA/ASH/ASPC/NMA/PCNA Guideline for the Prevention, Detection, Evaluation, and Management of High Blood Pressure in Adults: Executive Summary: A Report of the American College of Cardiology/American Heart Association Task F. *Circulation*. 2018;138(17):e426-e483. doi:10.1161/CIR.0000000000000597
2. Williams B, Mancia G, Spiering W, et al. 2018 ESC/ESH Guidelines for the management of arterial hypertension. *Eur Heart J*. 2018;39(33):3021-3104. doi:10.1093/eurheartj/ehy339
3. Mauri L, Kario K, Basile J, et al. A multinational clinical approach to assessing the effectiveness of catheter-based ultrasound renal denervation: The RADIANCE-HTN and REQUIRE clinical study designs. *Am Heart J*. 2018;195:115-129. doi:10.1016/j.ahj.2017.09.006
4. Azizi M, Schmieder RE, Mahfoud F, et al. Endovascular ultrasound renal denervation to treat hypertension (RADIANCE-HTN SOLO): a multicentre, international, single-blind, randomised, sham-controlled trial. *Lancet*. 2018;391(10137):2335-2345. doi:10.1016/S0140-6736(18)31082-1
