# Supplementary material for: Patient-Level Pooled Analysis of Ultrasound Renal Denervation in the Sham-Controlled RADIANCE II, RADIANCE-HTN SOLO, and RADIANCE-HTN TRIO Trials
Source: PubMed Central journal article supplement — JAMA Cardiol. 2023 Feb 28;8(5):464–73. doi: 10.1001/jamacardio.2023.0338 (PMC9975919; doi:10.1001/jamacardio.2023.0338), 2023-02-28
Supplement: jamacardiol-e230338-s003.pdf [file jamacardiol-e230338-s003.pdf]

**\*Group Name(s): RADIANCE Investigators and Collaborators**

| *First Name and Middle Initial(s) | *Last Name | *Suffix (eg, Jr, III) | Academic Degrees | Institution | Location (city, state/province, country) | Role or Contribution, eg, chair, principal investigator | Group (if more than 1 Group listed in the byline and/or Subgroup (eg, Steering Committee)) |
|-----------------------------------|------------|-----------------------|------------------|-------------|------------------------------------------|---------------------------------------------------------|--------------------------------------------------------------------------------------------|
| Candace K.                        | McClure    |                       |                  |             |                                          |                                                         |                                                                                            |
| Glenn                             | Chertow    |                       |                  |             |                                          |                                                         |                                                                                            |
| Venita                            | Chandra    |                       |                  |             |                                          |                                                         |                                                                                            |
| Harold                            | Dauerman   |                       |                  |             |                                          |                                                         |                                                                                            |
| Thomas                            | Kahan      |                       |                  |             |                                          |                                                         |                                                                                            |
| Steven                            | Ullery     |                       |                  |             |                                          |                                                         |                                                                                            |
| Venita                            | Chandra    |                       |                  |             |                                          |                                                         |                                                                                            |
| Nirat                             | Beohar     |                       |                  |             |                                          |                                                         |                                                                                            |
| Ozgen                             | Dogan      |                       |                  |             |                                          |                                                         |                                                                                            |
| Michelle                          | Mokrzycki  |                       |                  |             |                                          |                                                         |                                                                                            |
| Scott                             | Mullaney   |                       |                  |             |                                          |                                                         |                                                                                            |
| Bjorn                             | Redfors    |                       |                  |             |                                          |                                                         |                                                                                            |
| Huseng                            | Vefali     |                       |                  |             |                                          |                                                         |                                                                                            |
| J. Dawn                           | Abbott     |                       |                  |             |                                          |                                                         |                                                                                            |
| Andreas                           | Loening    |                       |                  |             |                                          |                                                         |                                                                                            |
| Ron                               | Zagoria    |                       |                  |             |                                          |                                                         |                                                                                            |
| Nedaa                             | Skeik      |                       |                  |             |                                          |                                                         |                                                                                            |
| Richard                           | Bae        |                       |                  |             |                                          |                                                         |                                                                                            |
| Amy                               | McMeans    |                       |                  |             |                                          |                                                         |                                                                                            |
| JoAnne                            | Goldman    |                       |                  |             |                                          |                                                         |                                                                                            |
| Rose                              | Peterson   |                       |                  |             |                                          |                                                         |                                                                                            |
| Desmond                           | Jay        |                       |                  |             |                                          |                                                         |                                                                                            |
| Robert                            | Schwartz   |                       |                  |             |                                          |                                                         |                                                                                            |
| John                              | Reilly     |                       |                  |             |                                          |                                                         |                                                                                            |
| Micheal                           | Cash       |                       |                  |             |                                          |                                                         |                                                                                            |
| Isabelle                          | Tutor      |                       |                  |             |                                          |                                                         |                                                                                            |
| Michael                           | Harrison   |                       |                  |             |                                          |                                                         |                                                                                            |
| Shannon Williams                  | Williams   |                       |                  |             |                                          |                                                         |                                                                                            |
| Maria                             | Jarvis     |                       |                  |             |                                          |                                                         |                                                                                            |

| *First Name and Middle Initial(s) | *Last Name  | *Suffix (eg, Jr, III) | Academic Degrees | Institution | Location (city, state/province, country) | Role or Contribution, eg, chair, principal investigator | Group (if more than 1 Group listed in the byline) and/or Subgroup (eg, Steering Committee) |
|-----------------------------------|-------------|-----------------------|------------------|-------------|------------------------------------------|---------------------------------------------------------|--------------------------------------------------------------------------------------------|
| Angel                             | Penning     |                       |                  |             |                                          |                                                         |                                                                                            |
| Janice                            | Lea         |                       |                  |             |                                          |                                                         |                                                                                            |
| Amanda                            | Fiebach     |                       |                  |             |                                          |                                                         |                                                                                            |
| Claudia                           | Merlin      |                       |                  |             |                                          |                                                         |                                                                                            |
| Bryan                             | Wells       |                       |                  |             |                                          |                                                         |                                                                                            |
| Suhail                            | Dohad       |                       |                  |             |                                          |                                                         |                                                                                            |
| Anne                              | Tran        |                       |                  |             |                                          |                                                         |                                                                                            |
| Kirin                             | Bhatia      |                       |                  |             |                                          |                                                         |                                                                                            |
| Hyun-Min                          | Kim         |                       |                  |             |                                          |                                                         |                                                                                            |
| Mohammad                          | Rashid      |                       |                  |             |                                          |                                                         |                                                                                            |
| Ronald                            | Victor      |                       |                  |             |                                          |                                                         |                                                                                            |
| Piotr                             | Sobieszczyk |                       |                  |             |                                          |                                                         |                                                                                            |
| Ian                               | Halliday    |                       |                  |             |                                          |                                                         |                                                                                            |
| Tay                               | Munson      |                       |                  |             |                                          |                                                         |                                                                                            |
| Laura                             | Mauri       |                       |                  |             |                                          |                                                         |                                                                                            |
| Alex                              | Smith       |                       |                  |             |                                          |                                                         |                                                                                            |
| Laura                             | Aseltine    |                       |                  |             |                                          |                                                         |                                                                                            |
| Jonathan                          | Williams    |                       |                  |             |                                          |                                                         |                                                                                            |
| Jason                             | Lindsey     |                       |                  |             |                                          |                                                         |                                                                                            |
| Steven                            | Laster      |                       |                  |             |                                          |                                                         |                                                                                            |
| Mathew                            | Bunte       |                       |                  |             |                                          |                                                         |                                                                                            |
| Anthony                           | Hart        |                       |                  |             |                                          |                                                         |                                                                                            |
| Dana                              | King        |                       |                  |             |                                          |                                                         |                                                                                            |
| Jamie                             | Hall        |                       |                  |             |                                          |                                                         |                                                                                            |
| Josh                              | Costello    |                       |                  |             |                                          |                                                         |                                                                                            |
| Courtney                          | Krathen     |                       |                  |             |                                          |                                                         |                                                                                            |
| Luot                              | Lewis       |                       |                  |             |                                          |                                                         |                                                                                            |
| Andrew                            | McElvarr    |                       |                  |             |                                          |                                                         |                                                                                            |
| Ashley                            | Willitts    |                       |                  |             |                                          |                                                         |                                                                                            |
| Thomas                            | Todoran     |                       |                  |             |                                          |                                                         |                                                                                            |
| Eric                              | Powers      |                       |                  |             |                                          |                                                         |                                                                                            |

| <b>*First Name and Middle Initial(s)</b> | <b>*Last Name</b> | <b>*Suffix (eg, Jr, III)</b> | Academic Degrees | Institution | Location (city, state/province, country) | Role or Contribution, eg, chair, principal investigator | Group (if more than 1 Group listed in the byline) and/or Subgroup (eg, Steering Committee) |
|------------------------------------------|-------------------|------------------------------|------------------|-------------|------------------------------------------|---------------------------------------------------------|--------------------------------------------------------------------------------------------|
| Casey                                    | Palmer            |                              |                  |             |                                          |                                                         |                                                                                            |
| Emily                                    | Hodskins          |                              |                  |             |                                          |                                                         |                                                                                            |
| Vijay                                    | Paladugu          |                              |                  |             |                                          |                                                         |                                                                                            |
| Anna                                     | Tecklenburg       |                              |                  |             |                                          |                                                         |                                                                                            |
| John                                     | Schindler         |                              |                  |             |                                          |                                                         |                                                                                            |
| John                                     | Pacella           |                              |                  |             |                                          |                                                         |                                                                                            |
| Matthew                                  | Muldoon           |                              |                  |             |                                          |                                                         |                                                                                            |
| MaryJo                                   | Albright          |                              |                  |             |                                          |                                                         |                                                                                            |
| Tracy                                    | Nicholson         |                              |                  |             |                                          |                                                         |                                                                                            |
| John                                     | Flack             |                              |                  |             |                                          |                                                         |                                                                                            |
| Youseff                                  | Chami             |                              |                  |             |                                          |                                                         |                                                                                            |
| Abdul Moiz                               | Hafiz             |                              |                  |             |                                          |                                                         |                                                                                            |
| Emily                                    | Starkey           |                              |                  |             |                                          |                                                         |                                                                                            |
| Kristal                                  | Adams             |                              |                  |             |                                          |                                                         |                                                                                            |
| Nelson                                   | Bernardo          |                              |                  |             |                                          |                                                         |                                                                                            |
| Judith                                   | Veis              |                              |                  |             |                                          |                                                         |                                                                                            |
| Hayder                                   | Hashim            |                              |                  |             |                                          |                                                         |                                                                                            |
| Suman                                    | Singh             |                              |                  |             |                                          |                                                         |                                                                                            |
| Donna                                    | Whitman           |                              |                  |             |                                          |                                                         |                                                                                            |
| Rick                                     | Stouffer          |                              |                  |             |                                          |                                                         |                                                                                            |
| Alan                                     | Hinderliter       |                              |                  |             |                                          |                                                         |                                                                                            |
| Meghan                                   | Allen             |                              |                  |             |                                          |                                                         |                                                                                            |
| Tatum                                    | Scholl            |                              |                  |             |                                          |                                                         |                                                                                            |
| Eric                                     | Pauley            |                              |                  |             |                                          |                                                         |                                                                                            |
| Tyrone                                   | Wade              |                              |                  |             |                                          |                                                         |                                                                                            |
| Pete                                     | Fong              |                              |                  |             |                                          |                                                         |                                                                                            |
| Chery                                    | Laffer            |                              |                  |             |                                          |                                                         |                                                                                            |
| James                                    | Gainer            |                              |                  |             |                                          |                                                         |                                                                                            |
| Mark                                     | Robbins           |                              |                  |             |                                          |                                                         |                                                                                            |
| Sherron                                  | Crook             |                              |                  |             |                                          |                                                         |                                                                                            |
| Ellen                                    | Hatchcock         |                              |                  |             |                                          |                                                         |                                                                                            |

| <b>*First Name and Middle Initial(s)</b> | <b>*Last Name</b> | <b>*Suffix (eg, Jr, III)</b> | Academic Degrees | Institution | Location (city, state/province, country) | Role or Contribution, eg, chair, principal investigator | Group (if more than 1 Group listed in the byline) and/or Subgroup (eg, Steering Committee) |
|------------------------------------------|-------------------|------------------------------|------------------|-------------|------------------------------------------|---------------------------------------------------------|--------------------------------------------------------------------------------------------|
| Sarita                                   | Maddel            |                              |                  |             |                                          |                                                         |                                                                                            |
| Debbie                                   | Cohen             |                              |                  |             |                                          |                                                         |                                                                                            |
| Jay                                      | Giri              |                              |                  |             |                                          |                                                         |                                                                                            |
| Taisei                                   | Kobayashi         |                              |                  |             |                                          |                                                         |                                                                                            |
| Robin                                    | Neubauer          |                              |                  |             |                                          |                                                         |                                                                                            |
| Suveeksha                                | Naidu             |                              |                  |             |                                          |                                                         |                                                                                            |
| Thu                                      | Vo                |                              |                  |             |                                          |                                                         |                                                                                            |
| Jai                                      | Radhakrishnan     |                              |                  |             |                                          |                                                         |                                                                                            |
| Candido                                  | Batres            |                              |                  |             |                                          |                                                         |                                                                                            |
| Suzanne                                  | Edwards           |                              |                  |             |                                          |                                                         |                                                                                            |
| Matheen                                  | Khuddus           |                              |                  |             |                                          |                                                         |                                                                                            |
| Suzanne                                  | Zentko            |                              |                  |             |                                          |                                                         |                                                                                            |
| Abby                                     | Touchton          |                              |                  |             |                                          |                                                         |                                                                                            |
| Marti                                    | Roberson          |                              |                  |             |                                          |                                                         |                                                                                            |
| James                                    | O'Meara           |                              |                  |             |                                          |                                                         |                                                                                            |
| Ilie                                     | Barb              |                              |                  |             |                                          |                                                         |                                                                                            |
| Abby                                     | Foster            |                              |                  |             |                                          |                                                         |                                                                                            |
| Alice                                    | Boyette           |                              |                  |             |                                          |                                                         |                                                                                            |
| Abhilash                                 | Akinapelli        |                              |                  |             |                                          |                                                         |                                                                                            |
| Lisa                                     | English           |                              |                  |             |                                          |                                                         |                                                                                            |
| Bridget                                  | Neumann           |                              |                  |             |                                          |                                                         |                                                                                            |
| Chanwit                                  | Roongsritong      |                              |                  |             |                                          |                                                         |                                                                                            |
| Priscilla                                | Nelson            |                              |                  |             |                                          |                                                         |                                                                                            |
| Farrel                                   | Mendelsohn        |                              |                  |             |                                          |                                                         |                                                                                            |
| Hutton                                   | Brantley          |                              |                  |             |                                          |                                                         |                                                                                            |
| Thomas                                   | Cawthon           |                              |                  |             |                                          |                                                         |                                                                                            |
| Susan                                    | DeRamus           |                              |                  |             |                                          |                                                         |                                                                                            |
| Wesley                                   | Wade              |                              |                  |             |                                          |                                                         |                                                                                            |
| Robert                                   | Fishman           |                              |                  |             |                                          |                                                         |                                                                                            |
| Edward                                   | Tuohy             |                              |                  |             |                                          |                                                         |                                                                                            |
| Jessica                                  | LeBlanc           |                              |                  |             |                                          |                                                         |                                                                                            |

| *First Name and Middle Initial(s) | *Last Name   | *Suffix (eg, Jr, III) | Academic Degrees | Institution | Location (city, state/province, country) | Role or Contribution, eg, chair, principal investigator | Group (if more than 1 Group listed in the byline) and/or Subgroup (eg, Steering Committee) |
|-----------------------------------|--------------|-----------------------|------------------|-------------|------------------------------------------|---------------------------------------------------------|--------------------------------------------------------------------------------------------|
| Tina                              | McCurry      |                       |                  |             |                                          |                                                         |                                                                                            |
| Amar                              | Krishnaswamy |                       |                  |             |                                          |                                                         |                                                                                            |
| Luke                              | Laffin       |                       |                  |             |                                          |                                                         |                                                                                            |
| Christopher                       | Bajzer       |                       |                  |             |                                          |                                                         |                                                                                            |
| Marilyn                           | Boros        |                       |                  |             |                                          |                                                         |                                                                                            |
| Monica                            | Branche      |                       |                  |             |                                          |                                                         |                                                                                            |
| Josephine                         | Abraham      |                       |                  |             |                                          |                                                         |                                                                                            |
| Anu                               | Abraham      |                       |                  |             |                                          |                                                         |                                                                                            |
| Inge                              | Stijleman    |                       |                  |             |                                          |                                                         |                                                                                            |
| Iran                              | Lavasani     |                       |                  |             |                                          |                                                         |                                                                                            |
| Hailey                            | Neilson      |                       |                  |             |                                          |                                                         |                                                                                            |
| Theophilus                        | Owan         |                       |                  |             |                                          |                                                         |                                                                                            |
| David                             | Hsi          |                       |                  |             |                                          |                                                         |                                                                                            |
| Scott                             | Martin       |                       |                  |             |                                          |                                                         |                                                                                            |
| Edward                            | Portnay      |                       |                  |             |                                          |                                                         |                                                                                            |
| Maryanne                          | Ducey        |                       |                  |             |                                          |                                                         |                                                                                            |
| Maryann                           | Fiebach      |                       |                  |             |                                          |                                                         |                                                                                            |
| Suzanne                           | Rose         |                       |                  |             |                                          |                                                         |                                                                                            |
| Elizabeth                         | DelMasro     |                       |                  |             |                                          |                                                         |                                                                                            |
| Carolina                          | Garavito     |                       |                  |             |                                          |                                                         |                                                                                            |
| Todd                              | Adams        |                       |                  |             |                                          |                                                         |                                                                                            |
| Andrew                            | Teklinski    |                       |                  |             |                                          |                                                         |                                                                                            |
| Adam                              | Leech        |                       |                  |             |                                          |                                                         |                                                                                            |
| Patrick                           | Drilling     |                       |                  |             |                                          |                                                         |                                                                                            |
| Lynda                             | Tulik        |                       |                  |             |                                          |                                                         |                                                                                            |
| Keith                             | Benzuly      |                       |                  |             |                                          |                                                         |                                                                                            |
| James                             | Paparello    |                       |                  |             |                                          |                                                         |                                                                                            |
| Dan                               | Fintel       |                       |                  |             |                                          |                                                         |                                                                                            |
| Haydee                            | Ramirez      |                       |                  |             |                                          |                                                         |                                                                                            |
| Lauren                            | Kats         |                       |                  |             |                                          |                                                         |                                                                                            |
| Paul                              | Huang        |                       |                  |             |                                          |                                                         |                                                                                            |

| *First Name and Middle Initial(s) | *Last Name | *Suffix (eg, Jr, III) | Academic Degrees | Institution | Location (city, state/province, country) | Role or Contribution, eg, chair, principal investigator | Group (if more than 1 Group listed in the byline) and/or Subgroup (eg, Steering Committee) |
|-----------------------------------|------------|-----------------------|------------------|-------------|------------------------------------------|---------------------------------------------------------|--------------------------------------------------------------------------------------------|
| Santanu                           | Biswas     |                       |                  |             |                                          |                                                         |                                                                                            |
| Serena                            | Risher     |                       |                  |             |                                          |                                                         |                                                                                            |
| Kristina                          | Pratt      |                       |                  |             |                                          |                                                         |                                                                                            |
| Uzoma                             | Ibebuogu   |                       |                  |             |                                          |                                                         |                                                                                            |
| Karen                             | Johnson    |                       |                  |             |                                          |                                                         |                                                                                            |
| William                           | Cushman    |                       |                  |             |                                          |                                                         |                                                                                            |
| Lisa                              | Jones      |                       |                  |             |                                          |                                                         |                                                                                            |
| Leigh                             | Jackson    |                       |                  |             |                                          |                                                         |                                                                                            |
| David                             | Landers    |                       |                  |             |                                          |                                                         |                                                                                            |
| Tilak                             | Pasala     |                       |                  |             |                                          |                                                         |                                                                                            |
| Thomas                            | Salazer    |                       |                  |             |                                          |                                                         |                                                                                            |
| Peter                             | Canino     |                       |                  |             |                                          |                                                         |                                                                                            |
| Patricia                          | Arakelian  |                       |                  |             |                                          |                                                         |                                                                                            |
| Yi-Ming                           | Yang       |                       |                  |             |                                          |                                                         |                                                                                            |
| Asma                              | Khaliq     |                       |                  |             |                                          |                                                         |                                                                                            |
| Mitchell                          | Weinberg   |                       |                  |             |                                          |                                                         |                                                                                            |
| Yihenew                           | Abetu      |                       |                  |             |                                          |                                                         |                                                                                            |
| Alana                             | Gulliver   |                       |                  |             |                                          |                                                         |                                                                                            |
| Joseph                            | Garasic    |                       |                  |             |                                          |                                                         |                                                                                            |
| Doug                              | Drachman   |                       |                  |             |                                          |                                                         |                                                                                            |
| Randy                             | Zusman     |                       |                  |             |                                          |                                                         |                                                                                            |
| Keneth                            | Rosenfield |                       |                  |             |                                          |                                                         |                                                                                            |
| Danny                             | Do         |                       |                  |             |                                          |                                                         |                                                                                            |
| Atul                              | Chugh      |                       |                  |             |                                          |                                                         |                                                                                            |
| Barry                             | Bertolet   |                       |                  |             |                                          |                                                         |                                                                                            |
| Brian                             | Go         |                       |                  |             |                                          |                                                         |                                                                                            |
| Raghava                           | Gallapudi  |                       |                  |             |                                          |                                                         |                                                                                            |
| Joel                              | Cohn       |                       |                  |             |                                          |                                                         |                                                                                            |
| Kevin                             | Rogers     |                       |                  |             |                                          |                                                         |                                                                                            |
| Sripal                            | Bangalore  |                       |                  |             |                                          |                                                         |                                                                                            |
| Stephan                           | Williams   |                       |                  |             |                                          |                                                         |                                                                                            |

| <b>*First Name and Middle Initial(s)</b> | <b>*Last Name</b> | <b>*Suffix (eg, Jr, III)</b> | Academic Degrees | Institution | Location (city, state/province, country) | Role or Contribution, eg, chair, principal investigator | Group (if more than 1 Group listed in the byline) and/or Subgroup (eg, Steering Committee) |
|------------------------------------------|-------------------|------------------------------|------------------|-------------|------------------------------------------|---------------------------------------------------------|--------------------------------------------------------------------------------------------|
| Stanley                                  | Cabos             |                              |                  |             |                                          |                                                         |                                                                                            |
| Carolina                                 | Rodriguez Alvarez |                              |                  |             |                                          |                                                         |                                                                                            |
| David                                    | Calhoun           |                              |                  |             |                                          |                                                         |                                                                                            |
| Thomas                                   | McElderry         |                              |                  |             |                                          |                                                         |                                                                                            |
| William                                  | Maddox            |                              |                  |             |                                          |                                                         |                                                                                            |
| Suzanne                                  | Oparil            |                              |                  |             |                                          |                                                         |                                                                                            |
| Sheila                                   | Kinder            |                              |                  |             |                                          |                                                         |                                                                                            |
| Jessie                                   | Goldman           |                              |                  |             |                                          |                                                         |                                                                                            |
| Gary                                     | Ledley            |                              |                  |             |                                          |                                                         |                                                                                            |
| Nancy                                    | Katof             |                              |                  |             |                                          |                                                         |                                                                                            |
| Sandeep                                  | Aggarwal          |                              |                  |             |                                          |                                                         |                                                                                            |
| Sriivasa                                 | Potluri           |                              |                  |             |                                          |                                                         |                                                                                            |
| Scott                                    | Biedermann        |                              |                  |             |                                          |                                                         |                                                                                            |
| Jacquelyn                                | Ward              |                              |                  |             |                                          |                                                         |                                                                                            |
| Megan                                    | White             |                              |                  |             |                                          |                                                         |                                                                                            |
| David                                    | Zidar             |                              |                  |             |                                          |                                                         |                                                                                            |
| Mehdi                                    | Shishehbor        |                              |                  |             |                                          |                                                         |                                                                                            |
| Barry                                    | Effron            |                              |                  |             |                                          |                                                         |                                                                                            |
| Marco                                    | Costa             |                              |                  |             |                                          |                                                         |                                                                                            |
| Terence                                  | Semenec           |                              |                  |             |                                          |                                                         |                                                                                            |
| Pei-Hsiu                                 | Huang             |                              |                  |             |                                          |                                                         |                                                                                            |
| Powell                                   | Jose              |                              |                  |             |                                          |                                                         |                                                                                            |
| Micheal                                  | Jones             |                              |                  |             |                                          |                                                         |                                                                                            |
| Anthony                                  | Mathur            |                              |                  |             |                                          |                                                         |                                                                                            |
| Ajay                                     | Jain              |                              |                  |             |                                          |                                                         |                                                                                            |
| Armida                                   | Balawon           |                              |                  |             |                                          |                                                         |                                                                                            |
| Oliver                                   | Zongo             |                              |                  |             |                                          |                                                         |                                                                                            |
| Christine                                | Topham            |                              |                  |             |                                          |                                                         |                                                                                            |
| Richard                                  | Anderson          |                              |                  |             |                                          |                                                         |                                                                                            |
| Elizabeth                                | Thompson          |                              |                  |             |                                          |                                                         |                                                                                            |

| *First Name and Middle Initial(s) | *Last Name | *Suffix (eg, Jr, III) | Academic Degrees | Institution | Location (city, state/province, country) | Role or Contribution, eg, chair, principal investigator | Group (if more than 1 Group listed in the byline) and/or Subgroup (eg, Steering Committee) |
|-----------------------------------|------------|-----------------------|------------------|-------------|------------------------------------------|---------------------------------------------------------|--------------------------------------------------------------------------------------------|
| Nikki                             | Spiro      |                       |                  |             |                                          |                                                         |                                                                                            |
| Elizabeth                         | Hodges     |                       |                  |             |                                          |                                                         |                                                                                            |
| Jaqueine                          | Holder     |                       |                  |             |                                          |                                                         |                                                                                            |
| Richard J.                        | D'Souza    |                       |                  |             |                                          |                                                         |                                                                                            |
| Sarah                             | Statton    |                       |                  |             |                                          |                                                         |                                                                                            |
| Lindsay                           | Wilkes     |                       |                  |             |                                          |                                                         |                                                                                            |
| Anil                              | Joseph     |                       |                  |             |                                          |                                                         |                                                                                            |
| Timothy                           | Ellam      |                       |                  |             |                                          |                                                         |                                                                                            |
| Alan                              | Bagnall    |                       |                  |             |                                          |                                                         |                                                                                            |
| Ralph                             | Jackson    |                       |                  |             |                                          |                                                         |                                                                                            |
| Victoria                          | Bridgett   |                       |                  |             |                                          |                                                         |                                                                                            |
| Peter                             | Wilson     |                       |                  |             |                                          |                                                         |                                                                                            |
| Neelanjan                         | Das        |                       |                  |             |                                          |                                                         |                                                                                            |
| Timothy                           | Doulton    |                       |                  |             |                                          |                                                         |                                                                                            |
| David                             | Loader     |                       |                  |             |                                          |                                                         |                                                                                            |
| Gemma                             | Hector     |                       |                  |             |                                          |                                                         |                                                                                            |
| Terry                             | Levy       |                       |                  |             |                                          |                                                         |                                                                                            |
| Clare                             | Bent       |                       |                  |             |                                          |                                                         |                                                                                            |
| Vivek                             | Kodoth     |                       |                  |             |                                          |                                                         |                                                                                            |
| Stephanie                         | Horler     |                       |                  |             |                                          |                                                         |                                                                                            |
| Sara                              | Nix        |                       |                  |             |                                          |                                                         |                                                                                            |
| David                             | Beckett    |                       |                  |             |                                          |                                                         |                                                                                            |
| Nicki                             | Lakeman    |                       |                  |             |                                          |                                                         |                                                                                            |
| Sarah                             | Kennard    |                       |                  |             |                                          |                                                         |                                                                                            |
| Amit                              | Patel      |                       |                  |             |                                          |                                                         |                                                                                            |
| Nicholas                          | Robinson   |                       |                  |             |                                          |                                                         |                                                                                            |
| Faris                             | Al-Janabi  |                       |                  |             |                                          |                                                         |                                                                                            |
| Jeremy                            | Sayer      |                       |                  |             |                                          |                                                         |                                                                                            |
| Sudha Ganesh                      | Iyer       |                       |                  |             |                                          |                                                         |                                                                                            |
| Emily                             | Redman     |                       |                  |             |                                          |                                                         |                                                                                            |
| Jonaifah                          | Ramirez    |                       |                  |             |                                          |                                                         |                                                                                            |



| <b>*First Name and Middle Initial(s)</b> | <b>*Last Name</b> | <b>*Suffix (eg, Jr, III)</b> | Academic Degrees | Institution | Location (city, state/province, country) | Role or Contribution, eg, chair, principal investigator | Group (if more than 1 Group listed in the byline) and/or Subgroup (eg, Steering Committee) |
|------------------------------------------|-------------------|------------------------------|------------------|-------------|------------------------------------------|---------------------------------------------------------|--------------------------------------------------------------------------------------------|
| Annaliza                                 | Sevillano         |                              |                  |             |                                          |                                                         |                                                                                            |
| Madelaine                                | Ocampo            |                              |                  |             |                                          |                                                         |                                                                                            |
| Sadat                                    | Ali Edroos        |                              |                  |             |                                          |                                                         |                                                                                            |
| Sandosh                                  | Padmanabhan       |                              |                  |             |                                          |                                                         |                                                                                            |
| Robert                                   | Gerber            |                              |                  |             |                                          |                                                         |                                                                                            |
| Mohamad                                  | Faris             |                              |                  |             |                                          |                                                         |                                                                                            |
| Andrew John                              | Marshall          |                              |                  |             |                                          |                                                         |                                                                                            |
| Janet                                    | Sinclair          |                              |                  |             |                                          |                                                         |                                                                                            |
| Hayley                                   | Pepper            |                              |                  |             |                                          |                                                         |                                                                                            |
| Cristina                                 | Elorz             |                              |                  |             |                                          |                                                         |                                                                                            |
| Justin                                   | David             |                              |                  |             |                                          |                                                         |                                                                                            |
| Neil                                     | Chapman           |                              |                  |             |                                          |                                                         |                                                                                            |
| Paula                                    | Burak             |                              |                  |             |                                          |                                                         |                                                                                            |
| Paula                                    | Carvelli          |                              |                  |             |                                          |                                                         |                                                                                            |
| Matthew                                  | Shun Shin         |                              |                  |             |                                          |                                                         |                                                                                            |
| James                                    | Howard            |                              |                  |             |                                          |                                                         |                                                                                            |
| Sachin                                   | Jadhav            |                              |                  |             |                                          |                                                         |                                                                                            |
| Jane                                     | Quinn             |                              |                  |             |                                          |                                                         |                                                                                            |
| Faisal                                   | Sharif            |                              |                  |             |                                          |                                                         |                                                                                            |
| Aishah                                   | Alhmoudi          |                              |                  |             |                                          |                                                         |                                                                                            |
| Mattia                                   | Lunardi           |                              |                  |             |                                          |                                                         |                                                                                            |
| Eileen                                   | Coen              |                              |                  |             |                                          |                                                         |                                                                                            |
| Nicola                                   | Glynn             |                              |                  |             |                                          |                                                         |                                                                                            |
| Michael                                  | Böhm              |                              |                  |             |                                          |                                                         |                                                                                            |
| Lucas                                    | Lauder            |                              |                  |             |                                          |                                                         |                                                                                            |
| Saarraaken                               | Kulenthiran       |                              |                  |             |                                          |                                                         |                                                                                            |
| Christina                                | Koch              |                              |                  |             |                                          |                                                         |                                                                                            |
| Angelika                                 | Wachter           |                              |                  |             |                                          |                                                         |                                                                                            |
| Sebastian                                | Ewen              |                              |                  |             |                                          |                                                         |                                                                                            |
| Jelena                                   | Lucic             |                              |                  |             |                                          |                                                         |                                                                                            |
| Axel                                     | Schmid            |                              |                  |             |                                          |                                                         |                                                                                            |

| *First Name and Middle Initial(s) | *Last Name      | *Suffix (eg, Jr, III) | Academic Degrees | Institution | Location (city, state/province, country) | Role or Contribution, eg, chair, principal investigator | Group (if more than 1 Group listed in the byline) and/or Subgroup (eg, Steering Committee) |
|-----------------------------------|-----------------|-----------------------|------------------|-------------|------------------------------------------|---------------------------------------------------------|--------------------------------------------------------------------------------------------|
| Dennis                            | Kannenkeril     |                       |                  |             |                                          |                                                         |                                                                                            |
| Christian                         | Ott             |                       |                  |             |                                          |                                                         |                                                                                            |
| Michael                           | Uder            |                       |                  |             |                                          |                                                         |                                                                                            |
| Ulrike                            | Heinritz        |                       |                  |             |                                          |                                                         |                                                                                            |
| Kerstin                           | Fröhlich-Endres |                       |                  |             |                                          |                                                         |                                                                                            |
| Karl -Philipp                     | Rommel          |                       |                  |             |                                          |                                                         |                                                                                            |
| Karl                              | Fengler         |                       |                  |             |                                          |                                                         |                                                                                            |
| Robert                            | Höllriegel      |                       |                  |             |                                          |                                                         |                                                                                            |
| Martin                            | Petzold         |                       |                  |             |                                          |                                                         |                                                                                            |
| Margit                            | Büttner         |                       |                  |             |                                          |                                                         |                                                                                            |
| Kai                               | Trautmann       |                       |                  |             |                                          |                                                         |                                                                                            |
| Joachim                           | Weil            |                       |                  |             |                                          |                                                         |                                                                                            |
| Tolga                             | Agdirlioglu     |                       |                  |             |                                          |                                                         |                                                                                            |
| Tanja                             | Köllner         |                       |                  |             |                                          |                                                         |                                                                                            |
| Jeannine                          | Stephan         |                       |                  |             |                                          |                                                         |                                                                                            |
| Lukas                             | Hafer           |                       |                  |             |                                          |                                                         |                                                                                            |
| Nikolaos                          | Dagkonakis      |                       |                  |             |                                          |                                                         |                                                                                            |
| Frank                             | Hamann          |                       |                  |             |                                          |                                                         |                                                                                            |
| Peter                             | Reimer          |                       |                  |             |                                          |                                                         |                                                                                            |
| Martin                            | Hausberg        |                       |                  |             |                                          |                                                         |                                                                                            |
| Ute                               | Ettl            |                       |                  |             |                                          |                                                         |                                                                                            |
| Ulrike                            | Petzsche        |                       |                  |             |                                          |                                                         |                                                                                            |
| Ralf                              | Hinrichs        |                       |                  |             |                                          |                                                         |                                                                                            |
| Isabella                          | Di Ponio-Voit   |                       |                  |             |                                          |                                                         |                                                                                            |
| Matthias                          | Lutz            |                       |                  |             |                                          |                                                         |                                                                                            |
| Lars Christian                    | Rump            |                       |                  |             |                                          |                                                         |                                                                                            |
| Johannes                          | Stegbauer       |                       |                  |             |                                          |                                                         |                                                                                            |
| Lars                              | Schimmöller     |                       |                  |             |                                          |                                                         |                                                                                            |
| Sebastian                         | Potthoff        |                       |                  |             |                                          |                                                         |                                                                                            |
| Claudia                           | Schmid          |                       |                  |             |                                          |                                                         |                                                                                            |
| Sylvia                            | Roeder          |                       |                  |             |                                          |                                                         |                                                                                            |

| *First Name and Middle Initial(s) | *Last Name        | *Suffix (eg, Jr, III) | Academic Degrees | Institution | Location (city, state/province, country) | Role or Contribution, eg, chair, principal investigator | Group (if more than 1 Group listed in the byline) and/or Subgroup (eg, Steering Committee) |
|-----------------------------------|-------------------|-----------------------|------------------|-------------|------------------------------------------|---------------------------------------------------------|--------------------------------------------------------------------------------------------|
| Patric                            | Kröpil            |                       |                  |             |                                          |                                                         |                                                                                            |
| Sabine                            | Genth-Zotz        |                       |                  |             |                                          |                                                         |                                                                                            |
| Denise                            | Kämpfner          |                       |                  |             |                                          |                                                         |                                                                                            |
| Armin                             | Grawe             |                       |                  |             |                                          |                                                         |                                                                                            |
| Johannes                          | Höhne             |                       |                  |             |                                          |                                                         |                                                                                            |
| Bärbel                            | Kaesberger        |                       |                  |             |                                          |                                                         |                                                                                            |
| Constantin                        | von zur Mühlen    |                       |                  |             |                                          |                                                         |                                                                                            |
| Dennis                            | Wolf              |                       |                  |             |                                          |                                                         |                                                                                            |
| Markus                            | Welzel            |                       |                  |             |                                          |                                                         |                                                                                            |
| Gudrun                            | Heinrichs         |                       |                  |             |                                          |                                                         |                                                                                            |
| Barbara                           | Trabitzsch        |                       |                  |             |                                          |                                                         |                                                                                            |
| Antoine                           | Cremer            |                       |                  |             |                                          |                                                         |                                                                                            |
| Panteleimon                       | Papadopoulos      |                       |                  |             |                                          |                                                         |                                                                                            |
| Julie                             | Gaudissard        |                       |                  |             |                                          |                                                         |                                                                                            |
| Florent                           | Maire             |                       |                  |             |                                          |                                                         |                                                                                            |
| Hervé                             | Trillaud          |                       |                  |             |                                          |                                                         |                                                                                            |
| Marine                            | Livrozet          |                       |                  |             |                                          |                                                         |                                                                                            |
| Asma                              | Regrag            |                       |                  |             |                                          |                                                         |                                                                                            |
| Valerie                           | Paquet            |                       |                  |             |                                          |                                                         |                                                                                            |
| Erika                             | Cornu             |                       |                  |             |                                          |                                                         |                                                                                            |
| David                             | Fouassier         |                       |                  |             |                                          |                                                         |                                                                                            |
| Aurélien                          | Lorthioir         |                       |                  |             |                                          |                                                         |                                                                                            |
| Pascal                            | Delsart           |                       |                  |             |                                          |                                                         |                                                                                            |
| Justin                            | Hennicaux         |                       |                  |             |                                          |                                                         |                                                                                            |
| Benjamin                          | Longere           |                       |                  |             |                                          |                                                         |                                                                                            |
| Coralie                           | Bailly-Sommeville |                       |                  |             |                                          |                                                         |                                                                                            |
| Fabien                            | Bertrand          |                       |                  |             |                                          |                                                         |                                                                                            |
| Guillaume                         | Ledieu            |                       |                  |             |                                          |                                                         |                                                                                            |
| François                          | Pontana           |                       |                  |             |                                          |                                                         |                                                                                            |
| Atul                              | Pathak            |                       |                  |             |                                          |                                                         |                                                                                            |

| *First Name and Middle Initial(s) | *Last Name    | *Suffix (eg, Jr, III) | Academic Degrees | Institution | Location (city, state/province, country) | Role or Contribution, eg, chair, principal investigator | Group (if more than 1 Group listed in the byline) and/or Subgroup (eg, Steering Committee) |
|-----------------------------------|---------------|-----------------------|------------------|-------------|------------------------------------------|---------------------------------------------------------|--------------------------------------------------------------------------------------------|
| Benjamin                          | Honton        |                       |                  |             |                                          |                                                         |                                                                                            |
| Marianne                          | Cottin        |                       |                  |             |                                          |                                                         |                                                                                            |
| Frédéric                          | Petit         |                       |                  |             |                                          |                                                         |                                                                                            |
| Pierr                             | Lantelme      |                       |                  |             |                                          |                                                         |                                                                                            |
| Constance                         | Berge         |                       |                  |             |                                          |                                                         |                                                                                            |
| Pierre-Yves                       | Courand       |                       |                  |             |                                          |                                                         |                                                                                            |
| Fatou                             | Langevin      |                       |                  |             |                                          |                                                         |                                                                                            |
| Melvin                            | Lafeber       |                       |                  |             |                                          |                                                         |                                                                                            |
| Victor                            | Zeijen        |                       |                  |             |                                          |                                                         |                                                                                            |
| Arno                              | Ruiter        |                       |                  |             |                                          |                                                         |                                                                                            |
| Elisabeth                         | Huijskens     |                       |                  |             |                                          |                                                         |                                                                                            |
| Lida                              | Feyz          |                       |                  |             |                                          |                                                         |                                                                                            |
| Jan                               | van Ramshorst |                       |                  |             |                                          |                                                         |                                                                                            |
| Peter                             | Blankestijn   |                       |                  |             |                                          |                                                         |                                                                                            |
| Michiel                           | Voskuil       |                       |                  |             |                                          |                                                         |                                                                                            |
| Zwaantina                         | Rittersma     |                       |                  |             |                                          |                                                         |                                                                                            |
| Helma                             | Dolmans       |                       |                  |             |                                          |                                                         |                                                                                            |
| A.A.                              | Kroon         |                       |                  |             |                                          |                                                         |                                                                                            |
| W.H.                              | van Zwam      |                       |                  |             |                                          |                                                         |                                                                                            |
| Jeannique                         | Vranken       |                       |                  |             |                                          |                                                         |                                                                                            |
| Claudia                           | de Haan       |                       |                  |             |                                          |                                                         |                                                                                            |
| Panagiotis                        | Xaplanteris   |                       |                  |             |                                          |                                                         |                                                                                            |
| Rachid                            | Briki         |                       |                  |             |                                          |                                                         |                                                                                            |
| Quentin                           | de Hemptinne  |                       |                  |             |                                          |                                                         |                                                                                            |
| Severine                          | Pascal        |                       |                  |             |                                          |                                                         |                                                                                            |
| Katty                             | Renard        |                       |                  |             |                                          |                                                         |                                                                                            |
| Pascal                            | Lefebvre      |                       |                  |             |                                          |                                                         |                                                                                            |
| Bert                              | Ferdinande    |                       |                  |             |                                          |                                                         |                                                                                            |
| Alexandre                         | Persu         |                       |                  |             |                                          |                                                         |                                                                                            |
| Jean                              | Renkin        |                       |                  |             |                                          |                                                         |                                                                                            |
| Frédéric                          | Maes          |                       |                  |             |                                          |                                                         |                                                                                            |

| *First Name and Middle Initial(s) | *Last Name  | *Suffix (eg, Jr, III) | Academic Degrees | Institution | Location (city, state/province, country) | Role or Contribution, eg, chair, principal investigator | Group (if more than 1 Group listed in the byline) and/or Subgroup (eg, Steering Committee) |
|-----------------------------------|-------------|-----------------------|------------------|-------------|------------------------------------------|---------------------------------------------------------|--------------------------------------------------------------------------------------------|
| Christophe                        | Beauloye    |                       |                  |             |                                          |                                                         |                                                                                            |
| Jean-Philippe                     | Lengelé     |                       |                  |             |                                          |                                                         |                                                                                            |
| Dominique                         | Huyberechts |                       |                  |             |                                          |                                                         |                                                                                            |
| Anne                              | Bouvier     |                       |                  |             |                                          |                                                         |                                                                                            |
| Juan                              | Iglesias    |                       |                  |             |                                          |                                                         |                                                                                            |
| Georg                             | Ehert       |                       |                  |             |                                          |                                                         |                                                                                            |
| Laetitia                          | Gallego     |                       |                  |             |                                          |                                                         |                                                                                            |
| Kevin                             | Dobretz     |                       |                  |             |                                          |                                                         |                                                                                            |
| Sylviane                          | Bottone     |                       |                  |             |                                          |                                                         |                                                                                            |
| Adam                              | Witkowski   |                       |                  |             |                                          |                                                         |                                                                                            |
| Andrzej                           | Januszewicz |                       |                  |             |                                          |                                                         |                                                                                            |
| Jacek Kądziela                    | Kądziela    |                       |                  |             |                                          |                                                         |                                                                                            |
| Aleksander                        | Prejbisj    |                       |                  |             |                                          |                                                         |                                                                                            |
| Dagmara                           | Hering      |                       |                  |             |                                          |                                                         |                                                                                            |
| Dariusz                           | Ciecwierz   |                       |                  |             |                                          |                                                         |                                                                                            |
| Milosz J.                         | Jaguszewski |                       |                  |             |                                          |                                                         |                                                                                            |
| Radoslaw                          | Owczuk      |                       |                  |             |                                          |                                                         |                                                                                            |
| Dariusz                           | Ciecwierz   |                       |                  |             |                                          |                                                         |                                                                                            |
