# Supplementary material for: Patient-Level Pooled Analysis of Ultrasound Renal Denervation in the Sham-Controlled RADIANCE II, RADIANCE-HTN SOLO, and RADIANCE-HTN TRIO Trials
Source: PubMed Central journal article supplement — JAMA Cardiol. 2023 Feb 28;8(5):464–73. doi: 10.1001/jamacardio.2023.0338 (PMC9975919; doi:10.1001/jamacardio.2023.0338), 2023-02-28
Supplement: jamacardiol-e230338-s004.pdf [file jamacardiol-e230338-s004.pdf]

## Data Sharing Statement

Kirtane. Patient-Level Pooled Analysis of Ultrasound Renal Denervation in the Sham-Controlled RADIANCE II, RADIANCE-HTN SOLO, and RADIANCE-HTN TRIO Trials. *JAMA Cardiol.* Published February 28, 2023. doi:10.1001/jamacardio.2023.0338

### Data

**Data available:** Yes

**Data types:** Deidentified participant data

**How to access data:** [ak189@cumc.columbia.edu](mailto:ak189@cumc.columbia.edu)

**When available:** beginning date: 04-01-2027

### Supporting Documents

**Document types:** None

### Additional Information

**Who can access the data:** Data will be shared upon reasonable request with researchers who submit a research proposal approved by the study principal investigators (Michel Azizi and Ajay J. Kirtane).

**Types of analyses:** For a specified purpose

**Mechanisms of data availability:** After approval of a proposal by the study principal investigators

**Any additional restrictions:** Data will be made available after research completion and approval of the product and product use in the EU and the USA.
